# Supplementary material for: Evaluation of the BD Phoenix Carbapenemase-Producing Organism Panels for the Detection of Carbapenemase Producers in Escherichia coli, Klebsiella pneumoniae and Pseudomonas aeruginosa
Source: MDPI journal article supplement (doi:10.3390/diagnostics13223417), 2023-11-09
Supplement: s1 [file s1]

Supplementary Table S1. Sequence of primers used for PCR reactions.

| Primer name | Sequence                  |
|-------------|---------------------------|
| KPC-1       | ATGTCACTGTATCGCCGTC       |
| KPC-2       | AATCCCTCGAGCGCGAGT        |
| IMP1        | CCWGATTTAAAAATYGARAAGCTTG |
| IMP2        | TGGCCAHGCTTCWAHATTTGCRTC  |
| VIM1        | GTTTGGTCGCATATCGCAAC      |
| VIM2        | AATGCGCAGCACCAGGATAGAA    |
| NDM-F       | GGTGCATGCCCCGGTGAAATC     |
| NDM-R       | ATGCTGGCCTTGGGGAACG       |
| OXA-48A     | TTGGTGGCATCGATTATCGG      |
| OXA-48B     | GAGCACTTCTTTTGTGATGGC     |
| GES-F       | CTATTACTGGCAGGGATCG       |
| GES-R       | CCTCTCAATGGTGTGGGT        |

Supplementary Table S2. CPO report, carbapenemase encoding genes and minimal inhibitory concentration (mg/ml) in *E. coli* clinical isolates

| ID      | CPO report | blaNDM | blaKPC | blaVIM | blaIMP | blaOXA-48 | AMK | FEP | FOX | CAZ | CRO | CIP | ETP | GEN | IPM   | LVX  | MEM  | MNO | TGC | SXT | SAM | ATM | CZA   | CZT | FOS  | NIT  | NOR | TZP |
|---------|------------|--------|--------|--------|--------|-----------|-----|-----|-----|-----|-----|-----|-----|-----|-------|------|------|-----|-----|-----|-----|-----|-------|-----|------|------|-----|-----|
| 21-0186 | Class A    | +      | +      | -      | -      | -         | <8  | >16 | >16 | >16 | Y4  | >2  | >1  | >8  | 4     | Y4   | >16  | 2   | <1  | Y4  | >16 | >16 | 4     | >8  | >128 | <32  | >8  | >64 |
| 21-0044 | Class B    | +      | -      | -      | -      | -         | >32 | >16 | >16 | >16 | Y4  | >2  | >1  | >8  | >8    | Y4   | >32  | 8   | <1  | Y4  | >16 | >16 | >8    | >8  | <16  | <32  | >8  | >64 |
| 21-0054 | NR         | +      | -      | -      | -      | +         | <8  | >16 | >16 | >16 | Y4  | >2  | >1  | >8  | >8    | Y4   | >32  | 8   | 2   | Y4  | >16 | >16 | >8    | >8  | <16  | 128  | >8  | >64 |
| 21-0058 | Class B    | +      | -      | -      | -      | +         | <8  | >16 | >16 | >16 | Y4  | >2  | >1  | >8  | >8    | Y4   | >32  | >16 | 2   | Y4  | >16 | >16 | >8    | >8  | <16  | <32  | >8  | >64 |
| 21-0059 | NR         | +      | -      | -      | -      | +         | <8  | >16 | >16 | >16 | Y4  | >2  | >1  | >8  | >8    | Y4   | >32  | 8   | 2   | Y4  | >16 | >16 | >8    | >8  | <16  | 64   | >8  | >64 |
| 21-0072 | Class B    | +      | -      | -      | -      | +         | <8  | >16 | >16 | >16 | Y4  | >2  | >1  | >8  | >8    | Y4   | >32  | 4   | 2   | Y4  | >16 | >16 | >8    | >8  | <16  | <32  | >8  | >64 |
| 21-0080 | Class B    | +      | -      | -      | -      | +         | <8  | >16 | >16 | >16 | Y4  | >2  | >1  | >8  | >8    | Y4   | >32  | 4   | 2   | Y4  | >16 | >16 | >8    | >8  | <16  | 64   | >8  | >64 |
| 21-0083 | NR         | +      | -      | -      | -      | +         | <8  | >16 | >16 | >16 | Y4  | >2  | >1  | >8  | >8    | Y4   | >32  | 8   | 2   | Y4  | >16 | >16 | >8    | >8  | <16  | <32  | >8  | >64 |
| 21-0085 | NR         | +      | -      | -      | -      | +         | 8   | >16 | >16 | >16 | Y4  | >2  | >1  | >8  | >8    | Y4   | >32  | 8   | 2   | Y4  | >16 | >16 | >8    | >8  | <16  | <32  | >8  | >64 |
| 21-0090 | Class B    | +      | -      | +      | -      | +         | <8  | >16 | >16 | >16 | Y4  | >2  | >1  | >8  | >8    | Y4   | >32  | 4   | 2   | Y4  | >16 | >16 | >8    | >8  | <16  | 64   | >8  | >64 |
| 21-0100 | NR         | -      | -      | -      | -      | -         | <8  | >16 | >16 | >16 | Y4  | >2  | 1   | >8  | <0.25 | Y4   | <0.5 | 2   | <1  | Y4  | >16 | >16 | <0.25 | >8  | <16  | <32  | >8  | 16  |
| 21-0103 | Class B    | +      | -      | -      | -      | +         | <8  | >16 | >16 | >16 | Y4  | >2  | >1  | >8  | >8    | Y4   | >32  | 4   | <1  | Y4  | >16 | >16 | >8    | >8  | <16  | 64   | >8  | >64 |
| 21-0108 | Class B    | +      | +      | -      | -      | -         | <8  | >16 | >16 | >16 | Y4  | >2  | >1  | >8  | >8    | Y4   | >32  | 4   | 2   | Y4  | >16 | >16 | >8    | >8  | <16  | <32  | >8  | >64 |
| 21-0118 | NR         | +      | -      | -      | +      | +         | <8  | >16 | >16 | >16 | Y4  | >2  | >1  | >8  | >8    | Y4   | >32  | 8   | 2   | Y4  | >16 | >16 | >8    | >8  | <16  | 64   | >8  | >64 |
| 21-0119 | Class B    | +      | -      | +      | -      | -         | <8  | >16 | >16 | >16 | Y4  | >2  | >1  | >8  | >8    | Y4   | >32  | 4   | 2   | Y4  | >16 | >16 | >8    | >8  | <16  | 64   | >8  | >64 |
| 21-0131 | NR         | +      | -      | -      | -      | +         | <8  | >16 | >16 | >16 | Y4  | >2  | >1  | >8  | >8    | Y4   | >32  | 16  | 2   | Y4  | >16 | >16 | >8    | >8  | <16  | <32  | >8  | >64 |
| 21-0133 | NR         | +      | -      | -      | -      | +         | <8  | >16 | >16 | >16 | Y4  | >2  | >1  | >8  | >8    | 4    | >32  | 8   | 2   | Y4  | >16 | >16 | >8    | >8  | <16  | 64   | >8  | >64 |
| 21-0134 | Class B    | +      | -      | -      | -      | +         | <8  | >16 | >16 | >16 | Y4  | >2  | >1  | >8  | >8    | Y4   | >32  | 4   | 2   | Y4  | >16 | >16 | >8    | >8  | <16  | 64   | >8  | >64 |
| 21-0177 | Class B    | +      | -      | -      | -      | +         | <8  | >16 | >16 | >16 | Y4  | >2  | >1  | >8  | >8    | Y4   | >32  | 4   | 2   | Y4  | >16 | >16 | >8    | >8  | <16  | 64   | >8  | >64 |
| 21-0181 | CP         | +      | -      | -      | -      | +         | 8   | >16 | >16 | >16 | Y4  | >2  | >1  | >8  | >8    | Y4   | >32  | <1  | <1  | Y4  | >16 | >16 | >8    | >8  | <16  | <32  | >8  | >64 |
| 21-0182 | Class B    | +      | -      | -      | -      | +         | <8  | >16 | >16 | >16 | Y4  | >2  | >1  | >8  | >8    | Y4   | >32  | 8   | 2   | Y4  | >16 | >16 | >8    | >8  | <16  | <32  | >8  | >64 |
| 21-0183 | NR         | +      | -      | -      | -      | -         | <8  | >16 | >16 | >16 | Y4  | >2  | >1  | >8  | >8    | Y4   | 32   | 8   | <1  | Y4  | >16 | >16 | >8    | >8  | <16  | <32  | >8  | >64 |
| 21-0184 | Class B    | +      | -      | -      | -      | +         | <8  | >16 | >16 | >16 | Y4  | >2  | >1  | >8  | >8    | Y4   | 32   | 8   | 2   | Y4  | >16 | >16 | >8    | >8  | <16  | 64   | >8  | >64 |
| 21-0185 | Class B    | +      | -      | -      | -      | -         | 8   | >16 | >16 | >16 | Y4  | >2  | >1  | >8  | >8    | Y4   | >32  | <1  | <1  | Y4  | >16 | >16 | >8    | >8  | <16  | <32  | >8  | >64 |
| 21-0187 | Class B    | +      | -      | -      | -      | +         | <8  | >16 | >16 | >16 | Y4  | >2  | >1  | >8  | >8    | Y4   | >32  | 16  | 2   | Y4  | >16 | >16 | >8    | >8  | <16  | <32  | >8  | >64 |
| 21-0191 | Class B    | +      | -      | -      | -      | +         | 8   | >16 | >16 | >16 | Y4  | >2  | >1  | >8  | >8    | Y4   | 32   | 4   | 2   | Y4  | >16 | >16 | >8    | >8  | <16  | <32  | >8  | >64 |
| 21-0192 | Class B    | +      | -      | -      | -      | +         | <8  | >16 | >16 | >16 | Y4  | >2  | >1  | >8  | >8    | Y4   | 32   | 4   | 2   | Y4  | >16 | >16 | >8    | >8  | <16  | <32  | >8  | >64 |
| 21-0196 | Class B    | +      | -      | -      | -      | -         | <8  | >16 | >16 | >16 | Y4  | >2  | >1  | >8  | >8    | Y4   | >32  | 8   | 4   | Y4  | >16 | >16 | >8    | >8  | 64   | >128 | >8  | >64 |
| 21-0197 | NR         | -      | -      | -      | -      | -         | <8  | >16 | >16 | >16 | Y4  | >2  | >1  | >8  | 0.5   | <0.5 | 8    | <1  | <1  | Y4  | >16 | >16 | >8    | >8  | <16  | <32  | >8  | >64 |
| 21-0198 | Class D    | -      | -      | -      | -      | -         | <8  | >16 | >16 | >16 | Y4  | >2  | >1  | >8  | >8    | Y4   | >32  | 2   | <1  | Y4  | >16 | >16 | <0.25 | >8  | <16  | <32  | >8  | >64 |
| 21-0199 | NR         | +      | -      | -      | -      | -         | <8  | >16 | >16 | >16 | Y4  | >2  | >1  | >8  | 1     | Y4   | 2    | 16  | <1  | Y4  | >16 | >16 | >8    | 4   | <16  | <32  | >8  | 16  |
| 21-0201 | NR         | -      | -      | -      | -      | +         | <8  | >16 | >16 | >16 | Y4  | >2  | >1  | >8  | >8    | Y4   | 32   | 8   | 2   | Y4  | >16 | >16 | >8    | >8  | <16  | <32  | >8  | >64 |
| 21-0203 | Class B    | +      | -      | -      | +      | +         | <8  | >16 | >16 | >16 | Y4  | >2  | >1  | >8  | >8    | Y4   | >32  | 4   | <1  | Y4  | >16 | >16 | >8    | >8  | <16  | <32  | >8  | >64 |
| 21-0210 | Class B    | +      | -      | -      | -      | +         | <8  | >16 | >16 | >16 | Y4  | >2  | >1  | >8  | >8    | Y4   | 32   | 4   | 2   | Y4  | >16 | >16 | >8    | >8  | <16  | 128  | >8  | >64 |
| 21-0212 | NR         | +      | -      | -      | -      | -         | <8  | >16 | >16 | >16 | Y4  | >2  | >1  | >8  | >8    | Y4   | >32  | 8   | 2   | Y4  | >16 | >16 | >8    | >8  | <16  | 64   | >8  | >64 |
| 21-0213 | Class B    | +      | -      | -      | -      | +         | <8  | >16 | >16 | >16 | Y4  | >2  | >1  | >8  | >8    | Y4   | >32  | 4   | 2   | Y4  | >16 | >16 | >8    | >8  | <16  | <32  | >8  | >64 |
| 21-0215 | NR         | +      | -      | -      | -      | +         | <8  | >16 | >16 | >16 | Y4  | >2  | >1  | >8  | >8    | Y4   | >32  | 8   | 2   | Y4  | >16 | 4   | >8    | >8  | <16  | 128  | >8  | >64 |
| 21-0216 | NR         | +      | -      | -      | -      | -         | <8  | >16 | >16 | >16 | Y4  | >2  | >1  | >8  | >8    | Y4   | 32   | 4   | <1  | Y4  | >16 | >16 | >8    | >8  | <16  | 64   | >8  | >64 |
| 21-0217 | Class B    | +      | -      | -      | -      | +         | <8  | >16 | >16 | >16 | Y4  | >2  | >1  | >8  | >8    | Y4   | 32   | 4   | 2   | Y4  | >16 | >16 | >8    | >8  | <16  | <32  | >8  | >64 |
| 21-0219 | Class B    | +      | -      | +      | -      | -         | <8  | >16 | >16 | >16 | Y4  | >2  | >1  | >8  | >8    | Y4   | 32   | 4   | 2   | Y4  | >16 | >16 | >8    | >8  | <16  | 128  | >8  | >64 |
| 21-0236 | Class B    | -      | -      | -      | -      | +         | <8  | >16 | >16 | >16 | Y4  | >2  | >1  | >8  | >8    | Y4   | 16   | 4   | 2   | Y4  | >16 | >16 | >8    | >8  | <16  | <32  | >8  | >64 |
| 21-0240 | Class B    | +      | -      | +      | -      | +         | 8   | >16 | >16 | >16 | Y4  | >2  | >1  | >8  | >8    | Y4   | >32  | 16  | 2   | Y4  | >16 | >16 | >8    | >8  | <16  | 128  | >8  | >64 |
| 21-0284 | Class B    | +      | -      | +      | -      | -         | <8  | >16 | >16 | >16 | Y4  | >2  | >1  | >8  | >8    | Y4   | >32  | 8   | <1  | Y4  | >16 | >16 | >8    | >8  | <16  | <32  | >8  | >64 |
| 21-0287 | NR         | -      | -      | -      | -      | -         | <8  | >16 | >16 | >16 | Y4  | >2  | >1  | >8  | >8    | Y4   | 32   | 8   | 2   | Y4  | >16 | >16 | >8    | >8  | <16  | 64   | >8  | >64 |
| 21-0288 | Class B    | +      | -      | -      | -      | -         | <8  | >16 | >16 | >16 | Y4  | >2  | >1  | >8  | >8    | 4    | 8    | <1  | <1  | Y4  | >16 | >16 | >8    | >8  | <16  | <32  | 4   | >64 |
| 21-0289 | NR         | +      | -      | -      | -      | +         | <8  | >16 | >16 | >16 | Y4  | >2  | >1  | >8  | >8    | 4    | 32   | 8   | 4   | Y4  | >16 | >16 | >8    | >8  | <16  | >128 | >8  | >64 |
| 21-0301 | NR         | +      | -      | -      | -      | +         | <8  | >16 | >16 | >16 | Y4  | >2  | >1  | >8  | >8    | Y4   | 32   | 8   | 4   | Y4  | >16 | >16 | >8    | >8  | <16  | <32  | >8  | >64 |
| 21-0302 | Class B    | +      | -      | -      | -      | +         | <8  | >16 | >16 | >16 | Y4  | >2  | >1  | >8  | >8    | Y4   | >32  | 4   | <1  | Y4  | >16 | >16 | >8    | >8  | <16  | <32  | >8  | >64 |
| 21-0350 | NR         | +      | -      | -      | -      | +         | <8  | >16 | >16 | >16 | Y4  | >2  | >1  | >8  | >8    | Y4   | >32  | 8   | 2   | Y4  | >16 | >16 | >8    | >8  | <16  | <32  | >8  | >64 |
| 21-0622 | NR         | +      | -      | -      | -      | +         | <8  | >16 | >16 | >16 | Y4  | >2  | >1  | >8  | >8    | Y4   | >16  | 8   | 2   | Y4  | >16 | >16 | >8    | >8  | <16  | <32  | >8  | >64 |
| 21-0623 | Class B    | +      | -      | -      | -      | +         | <8  | >16 | >16 | >16 | Y4  | >2  | >1  | >8  | >8    | Y4   | >16  | 4   | <1  | Y4  | >16 | >16 | >8    | >8  | <16  | 64   | >8  | >64 |
| 21-0624 | Class B    | +      | -      | -      | -      | +         | <8  | >16 | >16 | >16 | Y4  | >2  | >1  | >8  | >8    | Y4   | 32   | 4   | 2   | Y4  | >16 | >16 | >8    | >8  | <16  | 64   | >8  | >64 |
| 21-0625 | Class B    | +      | -      | -      | -      | +         | <8  | >16 | >16 | >16 | Y4  | >2  | >1  | >8  | >8    | Y4   | >16  | 4   | <1  | Y4  | >16 | >16 | >8    | >8  | <16  | 64   | >8  | >64 |
| 21-0627 | Class B    | +      | -      | -      | -      | +         | <8  | >16 | >16 | >16 | Y4  | >2  | >1  | >8  | >8    |      |      |     |     |     |     |     |       |     |      |      |     |     |

|         |         |   |   |   |   |   |   |   |     |     |     |     |    |    |    |    |       |    |      |     |    |    |     |     |       |    |     |      |     |     |     |
|---------|---------|---|---|---|---|---|---|---|-----|-----|-----|-----|----|----|----|----|-------|----|------|-----|----|----|-----|-----|-------|----|-----|------|-----|-----|-----|
| 22-1222 | Class B | + | - | - | - | - | - | - | 8   | >16 | >16 | >16 | >4 | >2 | >1 | <2 | >8    | >4 | >32  | 4   | 2  |    | >16 | >16 | >8    | >8 | <16 | <32  | >8  | >64 |     |
| 22-1230 | Class B | + | - | - | - | - | - | - | <8  | >16 | >16 | >16 | >4 | >2 | >1 | <2 | >8    | >4 | >32  | 4   | 2  |    | >16 | >16 | >8    | >8 | <16 | 64   | >8  | >64 |     |
| 22-1282 | Class B | + | - | - | - | - | - | - | <8  | >16 | >16 | >16 | >4 | >2 | >1 | <2 | >8    | >4 | 32   | 8   | 2  | >4 | >16 | >16 | >8    | >8 | <16 | 128  | >8  | >64 |     |
| 22-1297 | NR      | - | - | - | - | - | - | - | >32 | >16 | >16 | >16 | >4 | >2 | >1 | >8 | >8    | >4 | 8    | 8   | 2  |    | >16 | >16 | >8    | >8 | <16 | <32  | >8  | >64 |     |
| 22-1336 | Class B | + | - | - | - | - | - | - | >32 | >16 | >16 | >16 | >4 | >2 | >1 | >8 | >8    | >4 | 8    | 8   | 2  | >4 | >16 | >16 | >8    | >8 | <16 | <32  | >8  | >64 |     |
| 22-1374 | Class B | + | - | - | - | - | - | - | <8  | >16 | >16 | >16 | >4 | >2 | >1 | <2 | >8    | >4 | 16   | 4   | <1 | >4 | >16 | >16 | >8    | >8 | <16 | 64   | >8  | >64 |     |
| 22-1393 | NR      | - | - | - | - | - | - | + | <8  | >16 | >16 | >16 | >4 | >2 | >1 | <2 | 2     | >4 | 1    | >16 | <1 | >4 | >16 | >16 | 4     | >8 | <16 | <32  | >8  | >64 |     |
| 22-1396 | NR      | - | - | - | - | - | - | - | <8  | >16 | >16 | >16 | >4 | >2 | >1 | <2 | 2     | >4 | 1    | >16 | <1 | >4 | >16 | >16 | 4     | >8 | <16 | <32  | >8  | >64 |     |
| 22-1399 | Class D | - | - | - | - | - | - | + | <8  | >16 | >16 | >16 | >4 | >2 | >1 | >8 | 1     | >4 | 1    | 4   | <1 | <1 | >16 | >16 | 4     | >8 | <16 | <32  | >8  | >64 |     |
| 22-1401 | Class B | + | - | - | - | - | - | - | <8  | >16 | >16 | >16 | >4 | >2 | >1 | <2 | >8    | >4 | >32  | 8   | 2  | >4 | >16 | >16 | >8    | >8 | <16 | 64   | >8  | >64 |     |
| 22-1412 | Class B | + | - | - | - | - | - | - | <8  | >16 | >16 | >16 | >4 | >2 | >1 | <2 | >8    | >4 | >32  | 8   | 2  | >4 | >16 | >16 | >8    | >8 | <16 | 64   | >8  | >64 |     |
| 22-1413 | Class B | + | - | - | - | - | - | - | <8  | >16 | >16 | >16 | >4 | >2 | >1 | <2 | >8    | >4 | >32  | 8   | 2  | >4 | >16 | >16 | >8    | >8 | <16 | <32  | >8  | >64 |     |
| 22-1419 | Class B | + | - | - | - | - | - | - | <8  | >16 | >16 | >16 | >4 | >2 | >1 | <2 | >8    | >4 | >32  | 8   | 2  | >4 | >16 | >16 | >8    | >8 | <16 | 64   | >8  | >64 |     |
| 22-1431 | NR      | - | - | - | - | - | - | - | <8  | >16 | >16 | >16 | >4 | >2 | >1 | <2 | >8    | >4 | >32  | 16  | 4  | >4 | >16 | >16 | >8    | >8 | <16 | <32  | >8  | >64 |     |
| 22-1438 | NR *    | - | - | - | - | - | - | + | >32 | >16 | 16  | >16 | >4 | >2 | >1 | >8 | 1     | >4 | <0.5 | 8   | <1 | >4 | >16 | >16 | 1     | 4  | <16 | <32  | >8  | >64 |     |
| 22-1439 | NR *    | - | - | - | - | - | - | + | >32 | >16 | 16  | >16 | >4 | >2 | >1 | >8 | 1     | >4 | 1    | 8   | 2  | >4 | >16 | >16 | 0.5   | 4  | <16 | <32  | >8  | 64  |     |
| 22-1441 | NR      | + | - | - | - | - | - | - | <8  | >16 | >16 | >16 | >4 | >2 | >1 | <2 | >8    | >4 | 32   | 8   | 2  | >4 | >16 | >16 | >8    | >8 | <16 | 64   | >8  | >64 |     |
| 22-1691 | NR      | + | - | - | - | - | - | - | <8  | >16 | >16 | >16 | >4 | >2 | >1 | <2 | >8    | >4 | >32  | 8   | 2  | >4 | >16 | >16 | >8    | >8 | <16 | 64   | >8  | >64 |     |
| 22-1698 | Class B | + | - | - | - | - | - | - | <8  | >16 | >16 | >16 | >4 | >2 | >1 | <2 | >8    | >4 | >32  | 8   | 2  | >4 | >16 | >16 | >8    | >8 | <16 | <32  | >8  | >64 |     |
| 22-1699 | NR      | + | - | - | - | - | - | - | <8  | >16 | >16 | >16 | >4 | >2 | >1 | <2 | >8    | >4 | 32   | 4   | <1 | >4 | >16 | >16 | >8    | >8 | <16 | <32  | >8  | >64 |     |
| 22-1710 | NR      | - | - | - | - | - | - | - | <8  | >16 | >16 | >16 | >4 | >2 | >1 | <2 | >8    | >4 | >32  | 8   | 2  | >4 | >16 | >16 | >8    | >8 | <16 | 64   | >8  | >64 |     |
| 22-1737 | Class B | + | - | - | - | - | - | - | <8  | >16 | >16 | >16 | >4 | >2 | >1 | <2 | >8    | >4 | >32  | 16  | 2  | >4 | >16 | >16 | >8    | >8 | <16 | <32  | >8  | >64 |     |
| 22-1776 | NR      | + | - | - | - | - | - | - | <8  | >16 | >16 | >16 | >4 | >2 | >1 | <2 | >8    | >4 | 2    | 8   | 2  | >4 | >16 | >16 | >8    | >8 | <16 | 64   | >8  | >64 |     |
| 22-1780 | Class B | + | - | - | - | - | - | - | <8  | >16 | >16 | >16 | >4 | >2 | >1 | <2 | >8    | >4 | >32  | 8   | 2  | >4 | >16 | >16 | >8    | >8 | <16 | 128  | >8  | >64 |     |
| 22-1782 | NR      | - | - | - | - | - | - | - | 8   | >16 | >16 | >16 | >4 | >2 | 1  | 4  | <0.25 | >4 | >32  | 8   | 2  | >4 | >16 | >16 | >8    | >8 | <16 | 128  | >8  | >64 |     |
| 22-1804 | Class B | + | - | - | - | - | - | - | >32 | >16 | >16 | >16 | >4 | >2 | >1 | >8 | >8    | >4 | >32  | 4   | <1 | >4 | >16 | >16 | 16    | >8 | >8  | <16  | <32 | >8  | >64 |
| 22-1808 | Class B | + | - | - | - | - | - | - | 8   | >16 | >16 | >16 | >4 | >2 | >1 | <2 | >8    | >4 | >32  | 2   | <1 | >4 | >16 | >16 | >8    | >8 | 64  | <32  | >8  | >64 |     |
| 22-1809 | Class B | + | - | - | - | - | - | - | 8   | >16 | >16 | >16 | >4 | >2 | >1 | <2 | >8    | >4 | >32  | 2   | <1 | >4 | >16 | >16 | >8    | >8 | 32  | <32  | >8  | >64 |     |
| 22-1810 | Class B | + | - | - | - | - | - | - | <8  | >16 | >16 | >16 | >4 | >2 | >1 | <2 | >8    | >4 | >32  | 4   | 2  | >4 | >16 | >16 | >8    | >8 | <16 | <32  | >8  | >64 |     |
| 22-1832 | Class B | + | - | - | - | + | - | - | <8  | >16 | >16 | >16 | >4 | >2 | >1 | <2 | >8    | >4 | >32  | 4   | 2  | >4 | >16 | >16 | >8    | >8 | <16 | <32  | >8  | >64 |     |
| 22-1833 | Class B | + | - | - | - | - | - | - | <8  | >16 | >16 | >16 | >4 | >2 | >1 | <2 | >8    | >4 | >16  | 4   | 2  | >4 | >16 | >16 | >8    | >8 | <16 | <32  | >8  | >64 |     |
| 22-1834 | NR      | + | - | - | - | - | - | - | <8  | >16 | >16 | >16 | >4 | >2 | >1 | <2 | >8    | >4 | >16  | 4   | 2  | >4 | >16 | >16 | >8    | >8 | <16 | <32  | >8  | >64 |     |
| 22-1855 | Class B | + | - | - | - | - | - | - | <8  | >16 | >16 | >16 | >4 | >2 | >1 | <2 | >8    | >4 | >32  | 8   | 2  | >4 | >16 | >16 | >8    | >8 | <16 | 128  | >8  | >64 |     |
| 22-1856 | NR      | + | - | - | - | - | - | - | 8   | >16 | >16 | >16 | >4 | >2 | >1 | <2 | >8    | >4 | >32  | 8   | 2  | >4 | >16 | >16 | >8    | >8 | <16 | >128 | >8  | >64 |     |
| 22-1860 | Class B | + | - | - | - | - | - | - | <8  | >16 | >16 | >16 | >4 | >2 | >1 | <2 | >8    | >4 | >32  | 8   | 2  | >4 | >16 | >16 | >8    | >8 | <16 | 128  | >8  | >64 |     |
| 22-1862 | NR      | + | - | - | - | - | - | - | <8  | >16 | >16 | >16 | >4 | >2 | >1 | <2 | >8    | >4 | >32  | 8   | 2  | >4 | >16 | >16 | >8    | >8 | <16 | <32  | >8  | >64 |     |
| 22-1863 | Class B | + | - | - | - | - | - | - | <8  | >16 | >16 | >16 | >4 | >2 | >1 | <2 | >8    | >4 | 32   | >16 | 2  | >4 | >16 | >16 | >8    | >8 | <16 | <32  | >8  | >64 |     |
| 22-1864 | NR      | + | - | - | - | - | - | - | <8  | >16 | >16 | >16 | >4 | >2 | >1 | <2 | >8    | >4 | >32  | 8   | 2  | >4 | >16 | >16 | >8    | >8 | <16 | <32  | >8  | >64 |     |
| 22-1865 | NR      | + | - | - | - | - | - | - | <8  | >16 | >16 | >16 | >4 | >2 | >1 | <2 | >8    | >4 | >32  | 8   | 2  | >4 | >16 | >16 | >8    | >8 | <16 | <32  | >8  | >64 |     |
| 22-1866 | Class B | + | - | - | - | - | - | - | <8  | >16 | >16 | >16 | >4 | >2 | >1 | <2 | >8    | >4 | >32  | 4   | 2  | >4 | >16 | >16 | >8    | >8 | <16 | <32  | >8  | >64 |     |
| 22-1880 | Class B | + | - | - | - | - | - | - | <8  | >16 | >16 | >16 | >4 | >2 | >1 | <2 | >8    | >4 | >32  | 8   | 2  | >4 | >16 | >16 | >8    | >8 | <16 | <32  | >8  | >64 |     |
| 22-1881 | Class B | + | - | - | - | - | - | - | <8  | >16 | >16 | >16 | >4 | >2 | >1 | <2 | >8    | >4 | >32  | 8   | 2  | >4 | >16 | >16 | >8    | >8 | <16 | <32  | >8  | >64 |     |
| 22-1882 | NR      | + | - | - | - | - | - | - | <8  | >16 | >16 | >16 | >4 | >2 | >1 | <2 | >8    | >4 | >32  | 8   | 2  | >4 | >16 | >16 | >8    | >8 | <16 | <32  | >8  | >64 |     |
| 22-1937 | Class B | + | - | - | - | - | - | - | <8  | >16 | >16 | >16 | >4 | >2 | >1 | <2 | >8    | >4 | 32   | 4   | 2  | >4 | >16 | >16 | >8    | >8 | <16 | <32  | >8  | >64 |     |
| 22-1938 | Class B | + | - | - | - | - | - | - | <8  | >16 | >16 | >16 | >4 | >2 | >1 | <2 | >8    | >4 | >32  | 4   | <1 | >4 | >16 | >16 | >8    | >8 | <16 | <32  | >8  | >64 |     |
| 22-1941 | Class B | + | - | - | - | - | - | - | <8  | >16 | >16 | >16 | >4 | >2 | >1 | <2 | >8    | >4 | 32   | 4   | <1 | <1 | >16 | >16 | >8    | >8 | <16 | <32  | >8  | >64 |     |
| 22-1949 | CP      | - | - | - | - | - | - | + | <8  | <1  | 16  | <2  | <1 | 1  | <1 | <2 | 4     | <1 | 4    | <1  | <1 | <1 | >16 | <1  | <0.25 | >8 | <16 | <32  | 8   | >64 |     |
| 22-1950 | NR      | + | - | - | - | - | - | + | <8  | >16 | >16 | >16 | >4 | >2 | >1 | <2 | >8    | >4 | 32   | 8   | <1 | >4 | >16 | >16 | >8    | >8 | <16 | 64   | >8  | >64 |     |
| 22-1952 | NR      | + | - | - | - | - | - | - | <8  | >16 | >16 | >16 | >4 | >2 | >1 | <2 | >8    | >4 | 16   | 8   | 2  | >4 | >16 | 2   | >8    | >8 | <16 | <32  | >8  | >64 |     |
| 22-1953 | Class B | + | - | - | - | - | - | - | <8  | >16 | >16 | >16 | >4 | >2 | >1 | <2 | >8    | >4 | >32  | 4   | <1 | >4 | >16 | <1  | >8    | >8 | <16 | <32  | >8  | >64 |     |
| 22-1954 | Class B | + | - | - | - | - | - | - | <8  | >16 | >16 | >16 | >4 | >2 | >1 | <2 | >8    | >4 | 16   | 8   | 2  | >4 | >16 | >16 | >8    | >8 | <16 | 64   | >8  | >64 |     |
| 22-1963 | Class B | + | - | - | - | - | - | - | <8  | >16 | >16 | >16 | >4 | >2 | >1 | <2 | >8    | >4 | 32   | 4   | <1 | >4 | >16 | >16 | >8    | >8 | <16 | 64   | >8  | >64 |     |
| 22-1987 | Class B | + | - | - | - | - | - | - | <   |     |     |     |    |    |    |    |       |    |      |     |    |    |     |     |       |    |     |      |     |     |     |

AMK: amikacin, FEP: cefepime, FOX, ceftazidime, CRO: ceftazidime, CIP: ciprofloxacin, ETP: ertapenem, GEN: gentamicin, IPM: imipenem, LVX: levofloxacin, MEM: meropenem, MNO: minocycline, TGC: tigecycline, SXT: trimethoprim/sulfamethoxazole, SAM: ampicillin/sulbactam, ATM: aztreonam, CZA: ceftazidime-avibactam, CZT: ceftolozane/tazobactam, FOS: fosfomicin, NIT: nitrofurantoin, NOR: norfloxacin, TZP: piperacillin/tazobactam. NR: no recommendation, CP: carbapenemase producer. All had a MIC for ampicillin >16, cefuroxime XM >16, colistin ≤1. \* Extended spectrum β-lactamase producer. – negative, + positive

Supplementary Table S3. CPO report, carbapenemase encoding genes and minimal inhibitory concentration (µg/ml) in *K. pneumoniae* clinical isolates.

| ID      | CPO report | blaNDM | blaKPC | blaVIM | blaIMP | blaOXA-48 | AMK | FEP | FOX | CAZ | CRO | CIP   | COL | ETP | GEN | IPM | LVX | MEM  | MNO | TGC | SXT | SAM | ATM | CZA   | CZT | CXM | FOS  | NIT  | NOR | TZP |
|---------|------------|--------|--------|--------|--------|-----------|-----|-----|-----|-----|-----|-------|-----|-----|-----|-----|-----|------|-----|-----|-----|-----|-----|-------|-----|-----|------|------|-----|-----|
| 21-0194 | Class A    | -      | +      | -      | -      | -         | <8  | >16 | 16  | >16 | >4  | <0.12 | <1  | >1  | <2  | >8  | <1  | 32   | 2   | 2   | <1  | >16 | >16 | 4     | >8  | >16 | <16  | 64   | <2  | >64 |
| 22-1271 | Class B    | -      | -      | -      | -      | -         | 16  | >16 | >16 | >16 | >4  | >2    | <1  | >1  | 4   | >8  | >4  | 32   | >16 | 4   | >4  | >16 | >16 | 1     | >8  | >16 | <16  | >128 | >8  | >64 |
| 21-0001 | Class B    | +      | -      | -      | -      | -         | >32 | >16 | >16 | >16 | >4  | 2     | <1  | >1  | >8  | >8  | <1  | 16   | 4   | 2   | >4  | >16 | >16 | >8    | >16 | >16 | >128 | 64   | 4   | >64 |
| 21-0003 | NR         | +      | -      | -      | -      | -         | 32  | >16 | >16 | >16 | >4  | >2    | <1  | >1  | >8  | >8  | >4  | >32  | 16  | 4   | >4  | >16 | >16 | >8    | >8  | >16 | <16  | 128  | >8  | >64 |
| 21-0004 | Class B    | +      | -      | -      | -      | +         | >32 | >16 | >16 | >16 | >4  | <0.12 | <1  | >1  | >8  | >8  | <1  | 16   | 2   | 2   | >4  | >16 | >16 | >8    | >8  | >16 | >128 | 64   | <2  | >64 |
| 21-0005 | NR         | +      | -      | -      | -      | +         | 32  | >16 | >16 | >16 | >4  | >2    | >4  | >1  | >8  | >8  | <1  | 16   | 8   | 2   | >4  | >16 | >16 | >8    | >8  | >16 | >128 | 64   | 4   | >64 |
| 21-0006 | NR         | +      | -      | -      | -      | +         | 32  | >16 | >16 | >16 | >4  | >2    | >4  | >1  | >8  | >8  | <1  | >16  | 8   | 2   | >4  | >16 | >16 | >8    | >8  | >16 | <16  | 64   | 8   | >64 |
| 21-0007 | Class B    | +      | -      | -      | -      | +         | >32 | >16 | >16 | >16 | >4  | >2    | >4  | >1  | >8  | >8  | <1  | >32  | 8   | 2   | >4  | >16 | >16 | >8    | >8  | >16 | <16  | 64   | 4   | >64 |
| 21-0008 | Class B    | +      | -      | -      | -      | -         | 16  | >16 | >16 | >16 | >4  | 2     | <1  | >1  | >8  | >8  | 2   | >32  | >16 | 2   | <1  | >16 | >16 | >8    | >8  | >16 | <16  | <32  | 4   | >64 |
| 21-0009 | NR         | +      | -      | -      | -      | +         | 32  | >16 | >16 | >16 | >4  | >2    | >4  | >1  | >8  | >8  | <1  | 16   | 8   | 2   | >4  | >16 | >16 | >8    | >8  | >16 | <16  | 64   | 4   | >64 |
| 21-0010 | Class B    | +      | -      | -      | -      | +         | 32  | >16 | >16 | >16 | >4  | >2    | <1  | >1  | >8  | >8  | >4  | >32  | 16  | 4   | >4  | >16 | >16 | >8    | >8  | >16 | <16  | 128  | >8  | >64 |
| 21-0011 | Class B    | +      | -      | -      | -      | +         | 32  | >16 | >16 | >16 | >4  | 2     | <1  | >1  | >8  | >8  | 2   | >32  | >16 | 2   | <1  | >16 | >16 | >8    | >8  | >16 | 32   | 64   | 4   | >64 |
| 21-0012 | NR         | +      | -      | -      | -      | +         | 32  | >16 | >16 | >16 | >4  | >2    | >4  | >1  | >8  | >8  | <1  | >32  | 8   | 2   | >4  | >16 | >16 | >8    | >8  | >16 | <16  | 64   | 4   | >64 |
| 21-0013 | Class B    | +      | -      | -      | -      | +         | 32  | >16 | >16 | >16 | >4  | >2    | <1  | >1  | >8  | >8  | >4  | >32  | >16 | 4   | >4  | >16 | >16 | >8    | >8  | >16 | <16  | 128  | >8  | >64 |
| 21-0014 | Class B    | +      | -      | -      | -      | +         | 32  | >16 | >16 | >16 | >4  | 2     | <1  | >1  | >8  | >8  | 2   | >32  | >16 | 2   | <1  | >16 | >16 | >8    | >8  | >16 | 64   | 64   | 4   | >64 |
| 21-0015 | NR         | +      | -      | -      | -      | +         | 32  | >16 | >16 | >16 | >4  | 0.25  | <1  | >1  | >8  | >8  | <1  | 8    | 2   | 2   | >4  | >16 | >16 | >8    | >8  | >16 | <16  | 64   | <2  | >64 |
| 21-0016 | NR         | +      | -      | -      | -      | +         | 32  | >16 | >16 | >16 | >4  | >2    | >4  | >1  | >8  | >8  | >4  | >32  | 16  | 4   | >4  | >16 | >16 | >8    | >8  | >16 | <16  | 128  | >8  | >64 |
| 21-0017 | NR         | +      | -      | -      | -      | +         | 32  | >16 | >16 | >16 | >4  | >2    | >4  | >1  | >8  | >8  | <1  | >32  | 8   | 4   | >4  | >16 | >16 | >8    | >8  | >16 | >128 | >128 | 8   | >64 |
| 21-0019 | Class B    | +      | -      | -      | -      | +         | 32  | >16 | >16 | >16 | >4  | >2    | <1  | >1  | >8  | >8  | >4  | >32  | >16 | >4  | >4  | >16 | >16 | >8    | >8  | >16 | <16  | 128  | >8  | >64 |
| 21-0020 | Class B    | +      | -      | -      | -      | +         | 16  | >16 | >16 | >16 | >4  | 2     | <1  | >1  | >8  | >8  | 2   | >32  | >16 | 4   | <1  | >16 | >16 | >8    | >8  | >16 | <16  | <32  | 4   | >64 |
| 21-0021 | NR         | +      | -      | -      | -      | +         | 8   | >16 | >16 | >16 | >4  | >2    | <1  | >1  | 8   | >8  | >4  | 16   | >16 | 4   | <1  | >16 | >16 | <0.25 | >8  | >16 | <16  | <32  | >8  | >64 |
| 21-0023 | Class B    | +      | -      | -      | -      | +         | >32 | >16 | >16 | >16 | >4  | >2    | >4  | >1  | >8  | >8  | <1  | 32   | 16  | 4   | >4  | >16 | >16 | >8    | >8  | >16 | <16  | 128  | >8  | >64 |
| 21-0025 | NR         | +      | -      | -      | -      | +         | 32  | >16 | >16 | >16 | >4  | 2     | >4  | >1  | >8  | >8  | <1  | >32  | 8   | 2   | >4  | >16 | >16 | >8    | >8  | >16 | <16  | 64   | 4   | >64 |
| 21-0028 | Class B    | +      | -      | -      | -      | +         | >32 | >16 | >16 | >16 | >4  | 2     | >4  | >1  | >8  | >8  | <1  | 16   | 8   | 2   | >4  | >16 | >16 | >8    | >8  | >16 | <16  | 64   | 4   | >64 |
| 21-0030 | Class B    | +      | -      | -      | -      | +         | >32 | >16 | >16 | >16 | >4  | 2     | >4  | >1  | >8  | >8  | <1  | >16  | 8   | 2   | >4  | >16 | >16 | >8    | >8  | >16 | <16  | 64   | 4   | >64 |
| 21-0033 | NR         | +      | -      | -      | -      | +         | 32  | >16 | >16 | >16 | >4  | >2    | >4  | >1  | >8  | >8  | >4  | 16   | >16 | >4  | >4  | >16 | >16 | >8    | >8  | >16 | <16  | 128  | >8  | >64 |
| 21-0034 | NR         | +      | -      | -      | -      | -         | 16  | >16 | >16 | >16 | >4  | 1     | <1  | >1  | >8  | >8  | 2   | >32  | >16 | 2   | <1  | >16 | >16 | >8    | >8  | >16 | <16  | 128  | 4   | >64 |
| 21-0035 | Class B    | +      | -      | -      | -      | +         | 8   | >16 | >16 | >16 | >4  | >2    | <1  | >1  | >8  | >8  | 2   | >32  | >16 | 2   | >4  | >16 | >16 | >8    | >8  | >16 | <16  | <32  | >8  | >64 |
| 21-0036 | Class B    | +      | -      | -      | -      | +         | >32 | >16 | >16 | >16 | >4  | >2    | >4  | >1  | >8  | >8  | >4  | 32   | >16 | >4  | >4  | >16 | >16 | >8    | >8  | >16 | <16  | >128 | >8  | >64 |
| 21-0038 | Class B    | +      | -      | -      | -      | +         | 8   | >16 | >16 | >16 | >4  | 1     | >4  | >1  | >8  | >8  | <1  | >32  | >16 | 2   | >4  | >16 | >16 | >8    | >8  | >16 | <16  | 64   | <2  | >64 |
| 21-0042 | Class B    | +      | -      | -      | -      | +         | 8   | >16 | >16 | >16 | >4  | 1     | <1  | >1  | >8  | >8  | <1  | >32  | >16 | 2   | >4  | >16 | >16 | >8    | >8  | >16 | <16  | 64   | <2  | >64 |
| 21-0049 | NR         | +      | -      | -      | -      | -         | 8   | >16 | >16 | >16 | >4  | >2    | <1  | >1  | 8   | >8  | >4  | >32  | >16 | 4   | <1  | >16 | >16 | >8    | >8  | >16 | <16  | 128  | >8  | >64 |
| 21-0050 | NR         | +      | -      | -      | -      | +         | >32 | >16 | >16 | >16 | >4  | 2     | >4  | >1  | >8  | >8  | <1  | 16   | 8   | 2   | >4  | >16 | >16 | >8    | >8  | >16 | <16  | 128  | 8   | >64 |
| 21-0052 | NR         | +      | -      | -      | -      | +         | 32  | >16 | >16 | >16 | >4  | >2    | <1  | >1  | 8   | >8  | >4  | >32  | 8   | 4   | >4  | >16 | >16 | >8    | >8  | >16 | <16  | 128  | >8  | >64 |
| 21-0107 | NR *       | +      | -      | -      | -      | +         | 8   | >16 | 16  | >16 | >4  | >2    | <1  | >1  | >8  | 1   | <1  | <0.5 | 4   | 2   | >4  | >16 | >16 | 0.5   | >8  | >16 | 64   | >128 | >8  | >64 |
| 21-0113 | NR         | +      | -      | -      | -      | -         | <8  | >16 | >16 | >16 | >4  | >2    | <1  | >1  | >8  | >8  | >4  | >16  | 8   | 4   | >4  | >16 | >16 | >8    | >8  | >16 | <16  | 64   | >8  | >64 |
| 21-0114 | Class B    | +      | -      | +      | -      | +         | <8  | >16 | >16 | >16 | >4  | 2     | <1  | >1  | >8  | >8  | <1  | >16  | <1  | <1  | >4  | >16 | >16 | >8    | >8  | >16 | <16  | <32  | 4   | >64 |
| 21-0144 | Class B    | +      | -      | +      | -      | +         | 8   | >16 | >16 | >16 | >4  | >2    | <1  | >1  | >8  | >8  | >4  | >32  | >16 | 4   | <1  | >16 | >16 | >8    | >8  | >16 | <16  | >128 | >8  | >64 |
| 21-0145 | Class B    | +      | -      | -      | -      | +         | >32 | >16 | >16 | >16 | >4  | >2    | <1  | >1  | >8  | >8  | >4  | >32  | >16 | >4  | >4  | >16 | >16 | >8    | >8  | >16 | <16  | 128  | >8  | >64 |
| 21-0146 | Class B    | +      | -      | -      | -      | +         | 32  | >16 | >16 | >16 | >4  | >2    | <1  | >1  | >8  | >8  | >4  | >32  | >16 | >4  | >4  | >16 | >16 | >8    | >8  | >16 | <16  | 128  | >8  | >64 |
| 21-0149 | Class B    | +      | -      | -      | -      | +         | >32 | >16 | >16 | >16 | >4  | >2    | <1  | >1  | >8  | >8  | >4  | 32   | >16 | 4   | >4  | >16 | >16 | >8    | >8  | >16 | <16  | 128  | >8  | >64 |
| 21-0150 | Class B    | +      | -      | -      | -      | +         | 32  | >16 | >16 | >16 | >4  | >2    | <1  | >1  | >8  | >8  | >4  | 32   | >16 | >4  | >4  | >16 | >16 | >8    | >8  | >16 | <16  | 128  | >8  | >64 |
| 21-0151 | Class B    | +      | -      | -      | -      | +         | 32  | >16 | >16 | >16 | >4  | >2    | <1  | >1  | >8  | >8  | >4  | >32  | >16 | >4  | >4  | >16 | >16 | >8    | >8  | >16 | <16  | 128  | >8  | >64 |
| 21-0152 | Class B    | +      | -      | -      | -      | +         | 32  | >16 | >16 | >16 | >4  | >2    | <1  | >1  | >8  | >8  | >4  | >32  | >16 | 4   | >4  | >16 | >16 | >8    | >8  | >16 | <16  | 128  | >8  | >64 |
| 21-0154 | Class B    | +      | -      | -      | -      | +         | 32  | >16 | >16 | >16 | >4  | >2    | <1  | >1  | >8  | >8  | >4  | >32  | >16 | >4  | >4  | >16 | >16 | >8    | >8  | >16 | <16  | 128  | >8  | >64 |
| 21-0155 | NR         | +      | -      | -      | -      | -         | 8   | >16 | >16 | >16 | >4  | >2    | <1  | >1  | 8   | >8  | >4  | >32  | >16 | 4   | <1  | >16 | >16 | >8    | >8  | >16 | <16  | >128 | >8  | >64 |
| 21-0156 | Class B    | +      | -      | -      | -      | -         | >32 | >16 | >16 | >16 | >4  | <0.12 | >4  | >1  | >8  | >8  | <1  | 32   | 4   | 2   | >4  | >16 | <1  | >8    | >8  | >16 | <16  | <32  | <2  | >64 |
| 21-0159 | Class B    | +      | -      | -      | -      | -         | 8   | >16 | >16 | >16 | >4  | >2    | >4  | >1  | >8  | >8  | >4  | >32  | >16 | 4   | <1  | >16 | >16 | >8    | >8  | >16 | <16  | >128 | >8  | >64 |
| 21-0160 | Class B    | +      | -      | -      | -      | +         | 32  | >16 | >16 | >16 | >4  | >2    | <1  | >1  | >8  | >8  | >4  | >32  | >16 | 4   | >4  | >16 | >16 | >8    | >8  | >16 | <16  | 128  | >8  | >64 |
| 21-0162 | Class B    | +      | -      | -      | -      | +         | 8   | >16 | >16 | &gt |     |       |     |     |     |     |     |      |     |     |     |     |     |       |     |     |      |      |     |     |

|         |         |   |  |   |   |   |   |   |   |     |     |     |     |    |       |    |    |    |    |    |     |     |    |    |       |     |     |    |     |      |      |    |     |
|---------|---------|---|--|---|---|---|---|---|---|-----|-----|-----|-----|----|-------|----|----|----|----|----|-----|-----|----|----|-------|-----|-----|----|-----|------|------|----|-----|
| 21-0308 | NR      | + |  | - | - | - | - | - | + | 32  | >16 | >16 | >16 | >4 | >2    | >4 | >1 | ≤2 | >8 | >4 | >32 | >16 | 4  | >4 | >16   | >16 | >8  | >8 | >16 | ≤16  | 128  | >8 | >64 |
| 21-0337 | NR      | + |  | - | + | - | - | - | + | 32  | >16 | >16 | >16 | >4 | >2    | ≤1 | >1 | 4  | >8 | >4 | >32 | 8   | 2  | >4 | >16   | >16 | >8  | >8 | >16 | ≤16  | 64   | >8 | >64 |
| 21-0596 | Class B | + |  | - | - | - | - | - | - | 8   | >16 | >16 | >16 | >4 | >2    | ≤1 | >1 | >8 | >8 | >4 | >32 | >16 | >4 | ≤1 | >16   | >16 | >8  | >8 | >16 | ≤16  | 128  | >8 | >64 |
| 21-0597 | Class B | + |  | - | - | - | - | - | - | 16  | >16 | >16 | >16 | >4 | >2    | ≤1 | >1 | >8 | >8 | >4 | >32 | >16 | 4  | >4 | >16   | >16 | >8  | >8 | >16 | ≤16  | >128 | >8 | >64 |
| 21-0603 | Class B | + |  | - | - | - | - | - | + | 32  | >16 | >16 | >16 | >4 | >2    | ≤1 | >1 | >8 | >8 | >4 | >32 | >16 | 4  | >4 | >16   | >16 | >8  | >8 | >16 | ≤16  | 128  | >8 | >64 |
| 21-0607 | Class B | + |  | - | - | - | - | - | - | >32 | >16 | >16 | >16 | >4 | >2    | ≤1 | >1 | >8 | >8 | >4 | >32 | >16 | 4  | >4 | >16   | >16 | >8  | >8 | >16 | ≤16  | 128  | >8 | >64 |
| 21-0608 | Class B | + |  | - | - | - | - | - | + | 8   | >16 | >16 | >16 | >4 | >2    | ≤1 | >1 | >8 | >8 | 2  | >32 | >16 | 2  | 2  | >16   | >16 | >8  | >8 | >16 | ≤16  | ≤32  | >8 | >64 |
| 21-0609 | NR      | + |  | - | - | - | - | - | + | 8   | >16 | >16 | >16 | >4 | >2    | ≤1 | >1 | >8 | >8 | 2  | >32 | >16 | 4  | 2  | >16   | >16 | >8  | >8 | >16 | ≤16  | ≤32  | >8 | >64 |
| 21-0610 | NR      | + |  | - | + | - | - | - | + | 8   | >16 | >16 | >16 | >4 | >2    | ≤1 | >1 | 4  | >8 | 2  | >32 | >16 | 4  | >4 | >16   | >16 | >8  | >8 | >16 | ≤16  | ≤32  | >8 | >64 |
| 21-0633 | Class B | + |  | - | - | - | - | - | - | <8  | >16 | >16 | >16 | >4 | 1     | ≤1 | >1 | >8 | >8 | ≤1 | >32 | ≤1  | ≤1 | >4 | >16   | >16 | >8  | >8 | >16 | ≤16  | ≤32  | 4  | >64 |
| 21-0801 | Class B | + |  | - | - | - | - | - | - | <8  | >16 | >16 | >16 | >4 | 1     | ≤1 | >1 | ≤2 | >8 | ≤1 | >32 | 4   | 2  | >4 | >16   | 8   | >8  | >8 | >16 | ≤16  | ≤32  | 4  | >64 |
| 21-0802 | NR      | - |  | + | - | - | - | - | + | >32 | >16 | >16 | >16 | >4 | >2    | ≤1 | >1 | 4  | >8 | >4 | >32 | 4   | 4  | >4 | >16   | >16 | 2   | >8 | >16 | ≤16  | >128 | >8 | >64 |
| 21-1015 | Class B | + |  | - | - | - | - | - | - | >32 | >16 | >16 | >16 | >4 | >2    | ≤1 | >1 | ≤2 | >8 | >4 | 16  | 4   | 2  | >4 | >16   | >16 | >8  | >8 | >16 | ≤16  | 64   | >8 | >64 |
| 21-1021 | Class B | + |  | - | + | - | - | - | - | 32  | >16 | >16 | >16 | >4 | >2    | ≤1 | >1 | >8 | >8 | >4 | >32 | >16 | 4  | >4 | >16   | >16 | >8  | >8 | >16 | 32   | 128  | >8 | >64 |
| 21-1024 | Class B | + |  | - | - | - | - | - | - | 32  | >16 | >16 | >16 | >4 | >2    | ≤1 | >1 | >8 | >8 | >4 | >32 | 16  | 4  | >4 | >16   | >16 | >8  | >8 | >16 | ≤16  | 128  | >8 | >64 |
| 21-1028 | Class B | + |  | - | - | - | - | - | - | 8   | >16 | >16 | >16 | >4 | >2    | ≤1 | >1 | >8 | >8 | >4 | >32 | >16 | >4 | >4 | >16   | >16 | >8  | >8 | >16 | ≤16  | 64   | >8 | >64 |
| 21-1032 | CP      | + |  | - | + | - | - | - | - | 8   | >16 | >16 | >16 | >4 | 2     | ≤1 | >1 | >8 | >8 | 2  | >32 | >16 | 2  | ≤1 | >16   | >16 | >8  | >8 | >16 | 32   | 64   | 4  | >64 |
| 21-1074 | NR      | + |  | - | - | - | - | - | - | >32 | >16 | >16 | >16 | >4 | >2    | ≤1 | >1 | >8 | >8 | ≤1 | >32 | 8   | 4  | >4 | >16   | >16 | >8  | >8 | >16 | ≤16  | 128  | ≤2 | >64 |
| 21-1097 | NR      | + |  | - | - | - | - | - | - | 32  | >16 | >16 | >16 | >4 | >2    | ≤1 | >1 | >8 | >8 | >4 | >32 | 16  | 4  | >4 | >16   | >16 | >8  | >8 | >16 | ≤16  | 128  | >8 | >64 |
| 21-1098 | NR      | + |  | - | - | - | - | - | - | 16  | >16 | >16 | >16 | >4 | >2    | ≤1 | >1 | >8 | >8 | >4 | >32 | 8   | 4  | >4 | >16   | >16 | >8  | >8 | >16 | ≤16  | >128 | >8 | >64 |
| 21-1099 | NR      | - |  | - | + | - | - | - | - | 32  | >16 | >16 | >16 | >4 | 0.25  | ≤1 | >1 | >8 | >8 | >4 | 16  | 8   | 2  | >4 | >16   | >16 | >8  | >8 | >16 | ≤16  | >128 | >8 | >64 |
| 21-1099 | Class B | - |  | - | + | - | - | - | - | 32  | >16 | >16 | >16 | >4 | 0.25  | ≤1 | >1 | >8 | >8 | >4 | 32  | >16 | 2  | >4 | >16   | >16 | >8  | >8 | >16 | ≤16  | ≤32  | ≤2 | >64 |
| 21-1100 | NR      | + |  | - | - | - | - | - | - | 32  | >16 | >16 | >16 | >4 | >2    | ≤1 | >1 | >8 | >8 | >4 | >32 | >16 | 4  | >4 | >16   | >16 | >8  | >8 | >16 | 32   | 128  | >8 | >64 |
| 21-1104 | NR      | - |  | - | - | - | - | - | - | 32  | >16 | >16 | >16 | >4 | >2    | ≤1 | >1 | >8 | >8 | >4 | >32 | 16  | 4  | >4 | >16   | >16 | >8  | >8 | >16 | ≤16  | 128  | >8 | >64 |
| 21-1105 | Class B | - |  | - | - | - | - | - | - | >32 | >16 | >16 | >16 | >4 | >2    | ≤1 | >1 | >8 | >8 | >4 | >32 | 16  | 4  | >4 | >16   | >16 | >8  | >8 | >16 | ≤16  | >128 | >8 | >64 |
| 21-1106 | NR      | + |  | - | - | - | - | - | - | 32  | >16 | >16 | >16 | >4 | >2    | ≤1 | >1 | 4  | >8 | >4 | >32 | 16  | 4  | >4 | >16   | >16 | >8  | >8 | >16 | ≤16  | 128  | >8 | >64 |
| 21-1107 | NR      | - |  | - | - | - | - | - | - | 32  | >16 | >16 | >16 | >4 | >2    | ≤1 | >1 | 4  | >8 | >4 | >32 | 16  | 4  | >4 | >16   | >16 | >8  | >8 | >16 | ≤16  | 128  | >8 | >64 |
| 21-1108 | NR      | + |  | - | - | - | - | - | - | >32 | >16 | >16 | >16 | >4 | >2    | >4 | >1 | 8  | >8 | >4 | 2   | 8   | 4  | >4 | >16   | >16 | >8  | >8 | >16 | >128 | 64   | >8 | >64 |
| 21-1111 | NR      | - |  | - | - | - | - | - | - | 32  | >16 | >16 | >16 | >4 | >2    | >4 | >1 | >8 | >8 | >4 | >32 | 8   | 4  | >4 | >16   | >16 | >8  | >8 | >16 | 64   | 128  | >8 | >64 |
| 21-1114 | Class B | + |  | - | - | - | - | - | - | >32 | >16 | >16 | >16 | >4 | >2    | >4 | >1 | >8 | >8 | >4 | >32 | >16 | 4  | >4 | >16   | >16 | >8  | >8 | >16 | 128  | >128 | >8 | >64 |
| 21-1118 | Class B | + |  | - | - | - | - | - | - | 32  | >16 | >16 | >16 | >4 | >2    | ≤1 | >1 | >8 | >8 | >4 | >32 | >16 | 4  | >4 | >16   | >16 | >8  | >8 | >16 | 32   | 128  | >8 | >64 |
| 21-1119 | NR      | + |  | - | - | - | - | - | - | 32  | >16 | >16 | >16 | >4 | >2    | ≤1 | >1 | >8 | >8 | >4 | >32 | 16  | 4  | >4 | >16   | >16 | >8  | >8 | >16 | ≤16  | 128  | >8 | >64 |
| 21-1120 | NR      | - |  | + | + | + | + | - | - | <8  | 8   | 8   | 8   | >4 | ≤0.12 | >4 | >1 | ≤2 | 8  | ≤1 | 4   | 4   | 2  | ≤1 | >16   | >16 | 1   | 8  | >16 | ≤16  | 128  | ≤2 | >64 |
| 21-1123 | Class B | - |  | - | - | - | - | - | - | <8  | >16 | >16 | >16 | >4 | >2    | ≤1 | >1 | >8 | >8 | >4 | >32 | >16 | >4 | >4 | >16   | >16 | >8  | >8 | >16 | 128  | >128 | >8 | >64 |
| 21-1124 | NR      | - |  | - | - | - | - | - | - | <8  | ≤1  | <4  | ≤2  | 2  | ≤0.12 | ≤1 | >1 | ≤2 | 2  | ≤1 | 4   | 2   | 2  | ≤1 | >16   | >16 | 0.5 | 4  | >16 | ≤16  | 128  | ≤2 | >64 |
| 21-1125 | Class B | + |  | - | - | - | - | - | - | <8  | >16 | >16 | >16 | >4 | >2    | ≤1 | >1 | >8 | >8 | >4 | >32 | >16 | 4  | >4 | >16   | >16 | >8  | >8 | >16 | ≤16  | 128  | >8 | >64 |
| 21-1126 | NR      | - |  | - | - | - | - | - | - | 32  | >16 | >16 | >16 | >4 | >2    | >4 | >1 | >8 | >8 | >4 | 32  | 8   | 4  | >4 | >16   | >16 | >8  | >8 | >16 | 32   | 128  | 8  | >64 |
| 21-1129 | NR      | + |  | - | - | - | - | - | - | 32  | >16 | >16 | >16 | >4 | 2     | >4 | >1 | >8 | >8 | >4 | 32  | 8   | 2  | >4 | >16   | >16 | >8  | >8 | >16 | >128 | 128  | 8  | >64 |
| 22-1272 | Class B | + |  | - | - | - | - | - | - | <8  | >16 | >16 | >16 | >4 | >2    | >4 | >1 | ≤2 | >8 | >4 | >32 | >16 | 4  | >4 | >16   | ≤1  | >8  | >8 | >16 | >128 | >128 | >8 | >64 |
| 22-1289 | NR      | + |  | - | - | - | - | - | - | >32 | >16 | >16 | >16 | >4 | >2    | ≤1 | >1 | >8 | >8 | >4 | >32 | >16 | 2  | >4 | >16   | >16 | 8   | >8 | >16 | ≤16  | >128 | >8 | >64 |
| 22-1302 | Class B | + |  | - | - | - | - | - | - | >32 | >16 | >16 | >16 | >4 | 2     | ≤1 | >1 | 8  | >8 | >4 | >32 | 2   | 2  | ≤1 | >16   | >16 | >8  | >8 | >16 | ≤16  | ≤32  | 4  | >64 |
| 22-1303 | NR      | + |  | - | - | - | - | - | - | 32  | >16 | >16 | >16 | >4 | 2     | ≤1 | >1 | 4  | >8 | ≤1 | >32 | 4   | 2  | ≤1 | >16   | >16 | >8  | >8 | >16 | ≤16  | 64   | 8  | >64 |
| 22-1304 | Class B | + |  | - | - | - | - | - | - | 32  | >16 | >16 | >16 | >4 | 2     | ≤1 | >1 | ≤2 | 4  | ≤1 | 8   | 4   | 2  | >4 | >16   | ≤1  | >8  | >8 | >16 | ≤16  | 128  | ≤2 | >64 |
| 22-1305 | Class B | + |  | - | - | - | - | - | - | 16  | >16 | >16 | >16 | >4 | >2    | >4 | >1 | 8  | >8 | >4 | >32 | >16 | 4  | >4 | >16   | >16 | >8  | >8 | >16 | 64   | 128  | >8 | >64 |
| 22-1312 | NR      | + |  | - | - | - | - | - | - | 32  | >16 | >16 | >16 | >4 | 1     | ≤1 | >1 | ≤2 | >8 | >4 | >32 | 8   | 2  | >4 | >16   | >16 | >8  | >8 | >16 | 32   | 64   | 4  | >64 |
| 22-1315 | NR *    | + |  | - | - | - | - | - | - | <8  | >16 | >16 | >16 | >4 | >2    | ≤1 | >1 | >8 | 4  | ≤1 | 8   | 4   | 2  | >4 | >16   | >16 | 4   | >8 | >16 | 32   | 128  | >8 | >64 |
| 22-1317 | NR      | + |  | - | - | - | - | - | - | 32  | >16 | >16 | >16 | >4 | 1     | ≤1 | >1 | ≤2 | >8 | ≤1 | >32 | 4   | 4  | >4 | >16   | >16 | >8  | >8 | >16 | 64   | 64   | ≤2 | >64 |
| 22-1320 | Class A | - |  | + | - | - | - | - | - | 8   | >16 | 16  | >16 | >4 | 2     | ≤1 | >1 | >8 | >8 | ≤1 | 32  | 4   | 2  | >4 | >16   | >16 | 2   | >8 | >16 | ≤16  | ≤32  | 4  | >64 |
| 22-1322 | Class A | - |  | + | - | - | - | - | - | 8   | >16 | 16  | >16 | >4 | 2     | ≤1 | >1 | >8 | >8 | >4 | 16  | 4   | 2  | >4 | >16</ |     |     |    |     |      |      |    |     |

AMK: amikacin, AMP: ampicillin, FEP: cefepime, FOX, cefoxitin, CAZ: ceftazidime, CRO: ceftriaxone, CIP: ciprofloxacin, COL: colistin, ETP: ertapenem, GEN: gentamicin, IPM: imipenem, LVX: levofloxacin, MEM: meropenem, MNO: minocycline, TGC: tigecycline, SXT: trimethoprim/sulfamethoxazole, SAM: ampicillin/sulbactam, ATM: aztreonam, CZA: ceftazidime-avibactam, CZT: ceftolozane/tazobactam, CXM: cefuroxime, FOS: fosfomycin, NIT: nitrofurantoin, NOR: norfloxacin, TZP: piperacillin/tazobactam. NR: no recommendation, CP: carbapenemase producer. \* Extended spectrum  $\beta$ -lactamase producer. – negative, + positive

Supplementary Table S4. CPO report, carbapenemase encoding genes and minimal inhibitory concentration (µg/ml) in *P. aeruginosa* clinical isolates

| ID      | CPO report | blaVIM | blaIMP | blaGES | AMK | FEP | CAZ | CIP   | COL | GEN | IPM | LVX | MEM  | TGC | ATM | CZA | CZT | FOS | NIT  | NOR | TZP |
|---------|------------|--------|--------|--------|-----|-----|-----|-------|-----|-----|-----|-----|------|-----|-----|-----|-----|-----|------|-----|-----|
| 21-0075 | Class B    | +      | -      | -      | >32 | >16 | >16 | >2    | ≤1  | 8   | >8  | >4  | >32  | >4  | 8   | >8  | >8  | 32  | >128 | >8  | 64  |
| 21-0077 | Class B    | +      | -      | -      | >32 | >16 | >16 | >2    | ≤1  | 8   | >8  | >4  | >32  | >4  | 8   | >8  | >8  | ≤16 | >128 | >8  | 64  |
| 21-0078 | Class B    | +      | -      | -      | >32 | >16 | >16 | >2    | >4  | >8  | >8  | >4  | >32  | >4  | 16  | >8  | >8  | 64  | >128 | >8  | >64 |
| 21-0680 | CP         | -      | +      | +      | >32 | >16 | >16 | >2    | ≤1  | >8  | >8  | >4  | >32  | >4  | >16 | >8  | >8  | >64 | >128 | >8  | >64 |
| 21-700  | NR         | -      | -      | -      | ≤4  | 4   | 4   | 2     | ≤1  | 4   | 4   | 4   | ≤0.5 | >4  | 2   | 1   | ≤1  | >64 | >128 | 4   | 32  |
| 20-0490 | NR         | -      | -      | -      | ≤8  | 8   | 8   | 1     | ≤1  | ≤2  | >8  | 4   | 32   | >4  | >16 | 8   | ≤1  | 64  | >128 | 4   | 16  |
| 20-0503 | CP         | -      | -      | +      | >32 | >16 | >16 | >2    | ≤1  | >8  | >8  | >4  | >32  | >4  | >16 | >8  | >8  | >64 | >128 | >8  | >64 |
| 21-0063 | CP         | -      | -      | +      | >32 | >16 | >16 | >2    | ≤1  | >8  | >8  | >4  | >32  | >4  | >16 | >8  | >8  | >64 | >128 | >8  | >64 |
| 21-0069 | Class B    | +      | -      | -      | >32 | >16 | >16 | >2    | 2   | >8  | >8  | >4  | >32  | >4  | 8   | >8  | >8  | 32  | >128 | >8  | 64  |
| 21-0088 | CP         | +      | -      | -      | 16  | >16 | >16 | >2    | ≤1  | ≤2  | >8  | >4  | >32  | >4  | >16 | >8  | >8  | ≤16 | >128 | >8  | 64  |
| 21-0089 | Class A    | -      | -      | +      | >32 | >16 | >16 | >2    | ≤1  | >8  | >8  | >4  | >32  | >4  | >16 | >8  | >8  | 32  | >128 | >8  | >64 |
| 21-0220 | NR         | -      | -      | -      | ≤8  | 8   | 8   | 0.5   | ≤1  | ≤2  | >8  | 2   | 16   | >4  | >16 | 8   | ≤1  | 64  | >128 | ≤2  | 16  |
| 21-0222 | Class B    | +      | -      | -      | 32  | >16 | >16 | >2    | ≤1  | 4   | >8  | >4  | >32  | >4  | >16 | >8  | >8  | ≤16 | >128 | >8  | 64  |
| 21-0249 | NR         | -      | -      | -      | 8   | >16 | >16 | >2    | ≤1  | 4   | >8  | >4  | >32  | 4   | >16 | >8  | >8  | >64 | >128 | >8  | >64 |
| 21-0255 | CP         | -      | -      | -      | 16  | 16  | >16 | >2    | ≤1  | >8  | >8  | >4  | >32  | >4  | >16 | >8  | 4   | 64  | >128 | >8  | 64  |
| 21-0257 | CP         | +      | -      | -      | ≤8  | 8   | >16 | >2    | ≤1  | >8  | >8  | >4  | >32  | >4  | >16 | >8  | 8   | 64  | >128 | >8  | 32  |
| 21-0258 | Class B    | +      | -      | -      | 32  | >16 | >16 | >2    | ≤1  | 4   | >8  | >4  | >32  | >4  | >16 | >8  | >8  | ≤16 | >128 | >8  | 64  |
| 21-0259 | CP         | +      | -      | -      | 32  | 8   | >16 | >2    | ≤1  | >8  | >8  | >4  | >32  | >4  | >16 | >8  | 4   | 64  | >128 | >8  | 32  |
| 21-0262 | CP         | +      | -      | -      | 32  | >16 | >16 | >2    | ≤1  | 4   | >8  | >4  | >32  | >4  | 16  | >8  | >8  | ≤16 | >128 | >8  | 64  |
| 21-0263 | Class B    | +      | -      | -      | 32  | >16 | >16 | >2    | ≤1  | 4   | >8  | >4  | >32  | >4  | >16 | >8  | >8  | ≤16 | >128 | >8  | 64  |
| 21-0264 | CP         | -      | -      | -      | 32  | 8   | 16  | >2    | ≤1  | >8  | >8  | >4  | 32   | >4  | 8   | 4   | ≤1  | 32  | >128 | >8  | 8   |
| 21-0269 | Class A    | +      | -      | -      | ≤8  | 8   | 8   | 0.5   | ≤1  | ≤2  | >8  | 2   | 16   | >4  | >16 | 8   | ≤1  | 64  | >128 | ≤2  | 16  |
| 21-0270 | Class B    | +      | -      | -      | 32  | >16 | >16 | >2    | ≤1  | ≤2  | >8  | >4  | >32  | >4  | >16 | >8  | >8  | >64 | >128 | >8  | 64  |
| 21-0280 | NR         | -      | -      | -      | 32  | >16 | >16 | 2     | ≤1  | ≤2  | 4   | >4  | 4    | >4  | 8   | 4   | >8  | >64 | >128 | 8   | 32  |
| 21-0282 | NR         | -      | -      | -      | ≤8  | 8   | 4   | 2     | ≤1  | ≤2  | >8  | >4  | 4    | >4  | 8   | 4   | ≤1  | >64 | >128 | 8   | 8   |
| 21-0283 | NR         | -      | -      | -      | 32  | 8   | 8   | >2    | >4  | ≤2  | >8  | >4  | 16   | >4  | >16 | 4   | ≤1  | >64 | >128 | >8  | 8   |
| 21-0296 | Class D    | -      | -      | -      | >32 | >16 | >16 | >2    | ≤1  | >8  | >8  | >4  | >32  | >4  | >16 | >8  | >8  | 32  | >128 | >8  | >64 |
| 21-0317 | Class B    | -      | -      | -      | >32 | >16 | >16 | >2    | ≤1  | >8  | >8  | >4  | >32  | >4  | >16 | >8  | >8  | >64 | >128 | >8  | 32  |
| 21-0318 | NR         | -      | -      | -      | >32 | >16 | >16 | >2    | ≤1  | >8  | >8  | >4  | >32  | >4  | ≤1  | >8  | >8  | >64 | >128 | >8  | 64  |
| 21-0319 | CP         | -      | +      | -      | >32 | >16 | >16 | >2    | ≤1  | >8  | >8  | >4  | >32  | >4  | >16 | >8  | >8  | >64 | >128 | >8  | 64  |
| 21-0320 | CP         | -      | -      | +      | >32 | >16 | >16 | >2    | ≤1  | >8  | >8  | >4  | >32  | >4  | >16 | >8  | >8  | >64 | >128 | >8  | >64 |
| 21-0321 | CP         | -      | -      | -      | >32 | >16 | >16 | >2    | ≤1  | >8  | >8  | >4  | >32  | >4  | >16 | >8  | >8  | >64 | >128 | >8  | 64  |
| 21-0369 | NR         | -      | -      | -      | ≤8  | 4   | 4   | ≤0.12 | ≤1  | ≤2  | >8  | ≤1  | 8    | >4  | 8   | 2   | ≤1  | 64  | >128 | ≤2  | <4  |
| 21-0447 | NR         | -      | -      | -      | ≤8  | 16  | 8   | >2    | ≤1  | ≤2  | >8  | >4  | 32   | >4  | >16 | 8   | ≤1  | ≤16 | >128 | >8  | 32  |
| 21-0449 | CP         | -      | +      | -      | 8   | 16  | 16  | 1     | ≤1  | 4   | >8  | 4   | 16   | >4  | >16 | 8   | 2   | >64 | >128 | 4   | 16  |
| 21-0454 | NR         | -      | -      | -      | 32  | 16  | 8   | >2    | ≤1  | >8  | >8  | >4  | 32   | >4  | >16 | 4   | 2   | >64 | >128 | 8   | 8   |
| 21-0486 | CP         | -      | -      | -      | 16  | >16 | >16 | 0.5   | ≤1  | 8   | >8  | 4   | >32  | >4  | >16 | >8  | >8  | 32  | >128 | ≤2  | 32  |
| 21-0510 | NR         | -      | -      | -      | ≤4  | 8   | 8   | >2    | ≤1  | ≤2  | >8  | >4  | 16   | >4  | >16 | 4   | ≤1  | 32  | >128 | 8   | 16  |
| 21-0541 | NR         | -      | -      | -      | ≤4  | 8   | 8   | 0.25  | ≤1  | ≤2  | >8  | 2   | 16   | >4  | >16 | 4   | ≤1  | 64  | >128 | ≤2  | 16  |
| 21-0543 | Class A    | -      | -      | -      | >32 | >16 | >16 | >2    | ≤1  | >8  | >8  | >4  | 32   | >4  | >16 | 8   | >8  | 32  | >128 | >8  | 32  |
| 21-0549 | NR         | -      | -      | -      | ≤4  | 2   | 4   | ≤0.12 | ≤1  | ≤2  | >8  | ≤1  | 4    | >4  | 8   | 2   | ≤1  | 64  | >128 | ≤2  | <4  |
| 21-0554 | NR         | -      | -      | -      | ≤8  | 4   | 4   | ≤0.12 | ≤1  | ≤2  | >8  | ≤1  | 4    | >4  | 8   | 2   | ≤1  | 64  | >128 | ≤2  | <4  |
| 21-0575 | Class A    | -      | -      | -      | ≤8  | 16  | >16 | 0.5   | ≤1  | ≤2  | >8  | 2   | 32   | >4  | >16 | 4   | ≤1  | 64  | >128 | ≤2  | >64 |
| 21-0617 | Class B    | -      | +      | +      | >32 | >16 | >16 | 2     | ≤1  | 8   | >8  | >4  | 16   | >4  | >16 | >8  | >8  | 32  | >128 | >8  | 64  |
| 21-0618 | NR         | -      | -      | -      | ≤8  | 8   | 8   | 0.25  | ≤1  | ≤2  | >8  | ≤1  | 16   | >4  | >16 | 4   | ≤1  | 32  | >128 | ≤2  | 16  |
| 21-0629 | NR         | -      | -      | -      | ≤4  | 4   | 4   | ≤0.12 | ≤1  | ≤2  | >8  | ≤1  | 8    | >4  | 8   | 2   | ≤1  | 32  | >128 | ≤2  | 8   |
| 21-0631 | NR         | -      | -      | -      | ≤8  | 16  | >16 | >2    | ≤1  | >8  | >8  |     | >16  | >4  |     | >8  |     |     |      |     | 32  |
| 21-0631 | Class D    | -      | -      | -      | ≤4  | 8   | >16 | >2    | ≤1  | >8  | >8  | >4  | >32  | >4  | >16 | >8  | 2   | 64  | >128 | >8  | 32  |
| 21-0634 | CP         | -      | -      | -      | ≤8  | 16  | 8   | 1     | ≤1  | ≤2  | >8  | 2   | 16   | >4  | >16 | 8   | ≤1  | 64  | >128 | ≤2  | 16  |
| 21-0635 | Class B    | +      | -      | -      | >32 | >16 | >16 | >2    | ≤1  | ≤2  | >8  | >4  | >32  | >4  | >16 | >8  | >8  | ≤16 | >128 | >8  | 64  |
| 21-0636 | Class B    | -      | -      | -      | 16  | >16 | >16 | >2    | ≤1  | >8  | >8  | >4  | 32   | >4  | >16 | >8  | 4   | 32  | >128 | >8  | >64 |
| 21-0637 | NR         | -      | -      | +      | >32 | >16 | >16 | >2    | ≤1  | >8  | >8  |     | 16   | >4  |     | 8   |     |     |      |     | 32  |
| 21-0637 | Class D    | -      | -      | +      | >32 | >16 | >16 | >2    | ≤1  | >8  | >8  | >4  | 16   | >4  | 4   | 4   | >8  | 32  | >128 | >8  | 32  |
| 21-0638 | NR         | -      | +      | -      | 16  | >16 | >16 | >2    | ≤1  | ≤2  | >8  |     | >16  | >4  |     | >8  |     |     |      |     | 64  |
| 21-0638 | Class B    | -      | +      | -      | 16  | 16  | >16 | >2    | ≤1  | ≤2  | >8  | >4  | >32  | >4  | >16 | >8  | >8  | ≤16 | >128 | >8  | 64  |
| 21-0647 | CP         | -      | +      | +      | >32 | >16 | >16 | >2    | ≤1  | >8  | >8  | >4  | >32  | >4  | >16 | >8  | >8  | >64 | >128 | >8  | >64 |
| 21-0648 | CP         | -      | -      | +      | >32 | >16 | >16 | >2    | ≤1  | >8  | >8  | >4  | >32  | >4  | >16 | >8  | >8  | >64 | >128 | >8  | >64 |
| 21-0650 | CP         | -      | -      | +      | >32 | >16 | >16 | >2    | ≤1  | >8  | >8  | >4  | >32  | >4  | >16 | >8  | >8  | >64 | >128 | >8  | >64 |

|         |         |   |   |   |     |     |     |       |    |    |    |    |     |    |     |    |    |     |      |    |     |
|---------|---------|---|---|---|-----|-----|-----|-------|----|----|----|----|-----|----|-----|----|----|-----|------|----|-----|
| 21-0659 | NR      | - | - | - | ≤4  | 16  | 8   | 1     | ≤1 | ≤2 | >8 | 4  | 16  | >4 | >16 | 8  | ≤1 | 64  | >128 | 4  | 32  |
| 21-0660 | Class B | - | + | + | >32 | >16 | >16 | >2    | ≤1 | >8 | >8 | >4 | >32 | >4 | 8   | >8 | >8 | 32  | >128 | >8 | 64  |
| 21-0661 | Class A | - | - | + | >32 | >16 | >16 | >2    | ≤1 | >8 | >8 | >4 | 32  | >4 | >16 | 8  | >8 | 32  | >128 | >8 | 32  |
| 21-0662 | NR      | - | - | + | >32 | >16 | >16 | >2    | ≤1 | >8 | >8 |    | >16 | >4 |     | 8  |    |     |      |    | 32  |
| 21-0662 | Class A | - | - | + | >32 | >16 | >16 | >2    | ≤1 | >8 | >8 | >4 | 32  | >4 | >16 | 8  | >8 | 32  | >128 | >8 | 64  |
| 21-0663 | CP      | - | - | + | >32 | >16 | >16 | >2    | ≤1 | >8 | >8 | >4 | >32 | >4 | >16 | >8 | >8 | >64 | >128 | >8 | >64 |
| 21-0664 | CP      | - | - | + | >32 | >16 | >16 | >2    | ≤1 | >8 | >8 | >4 | >32 | >4 | >16 | >8 | >8 | >64 | >128 | >8 | >64 |
| 21-0666 | NR      | + | - | - | >32 | >16 | >16 | >2    | ≤1 | >8 | >8 |    | >16 | >4 |     | >8 |    |     |      |    | 64  |
| 21-0666 | Class B | + | - | - | 16  | 4   | 4   | ≤0.12 | ≤1 | >8 | >8 | ≤1 | 8   | >4 | 8   | 2  | ≤1 | 32  | >128 | ≤2 | 8   |
| 21-0675 | Class A | - | + | + | >32 | >16 | >16 | >2    | ≤1 | >8 | >8 | >4 | 32  | >4 | >16 | 8  | >8 | 64  | >128 | >8 | 32  |
| 21-0679 | CP      | - | - | + | >32 | >16 | >16 | >2    | ≤1 | >8 | >8 | >4 | >32 | >4 | >16 | >8 | >8 | >64 | >128 | >8 | >64 |
| 21-0785 | NR      | - | - | - | ≤8  | 8   | >16 | >2    | ≤1 | ≤2 | >8 | >4 | 32  | >4 | 16  | 2  | ≤1 | >64 | >128 | >8 | 16  |
| 21-0787 | Class B | + | - | - | ≤8  | 16  | >16 | >2    | ≤1 | 4  | >8 | >4 | >32 | >4 | 16  | >8 | >8 | ≤16 | >128 | >8 | 32  |
| 21-0788 | Class D | - | - | - | >32 | >16 | >16 | >2    | ≤1 | >8 | 2  | >4 | 4   | >4 | >16 | >8 | >8 | 32  | >128 | >8 | >64 |
| 21-0789 | Class B | + | - | - | 32  | 16  | 16  | >2    | ≤1 | ≤2 | >8 | >4 | >32 | >4 | 8   | >8 | >8 | ≤16 | >128 | >8 | 16  |
| 21-0790 | Class B | + | + | - | 32  | >16 | >16 | >2    | ≤1 | ≤2 | >8 | >4 | >32 | >4 | 16  | >8 | >8 | ≤16 | >128 | >8 | 64  |
| 21-0805 | NR      | - | - | - | ≤8  | 4   | 4   | ≤0.12 | ≤1 | ≤2 | >8 | ≤1 | 8   | >4 | 8   | 4  | ≤1 | 64  | >128 | ≤2 | 8   |
| 21-0806 | Class D | - | - | - | ≤8  | >16 | >16 | ≤0.12 | ≤1 | ≤2 | >8 | ≤1 | 16  | >4 | >16 | 8  | 2  | ≤16 | >128 | ≤2 | >64 |
| 21-0807 | Class A | - | - | - | ≤8  | 16  | 16  | 1     | ≤1 | ≤2 | >8 | 2  | 32  | >4 | >16 | 8  | ≤1 | 64  | >128 | ≤2 | 32  |
| 21-0808 | NR      | - | - | - | ≤8  | 8   | 8   | 1     | ≤1 | ≤2 | >8 | 4  | 16  | >4 | >16 | 8  | ≤1 |     | >128 | 4  | 32  |
| 21-0811 | Class A | - | - | - | ≤8  | 16  | 8   | 0.25  | ≤1 | ≤2 | >8 | 2  | 32  | >4 | >16 | 8  | ≤1 | >64 | >128 | ≤2 | 16  |
| 21-0817 | Class A | - | - | - | ≤8  | 16  | 16  | >2    | ≤1 | ≤2 | >8 | >4 | 32  | >4 | >16 | >8 | ≤1 | 64  | >128 | >8 | 32  |
| 21-0936 | NR      | - | - | - | ≤8  | 8   | 4   | 1     | ≤1 | ≤2 | >8 | 2  | 8   | >4 | 8   | 2  | ≤1 | 64  | >128 | ≤2 | 8   |
| 21-0947 | Class D | - | - | + | 8   | >16 | >16 | >2    | ≤1 | 4  | >8 | >4 | 16  | >4 | >16 | >8 | 8  | >64 | >128 | >8 | >64 |
| 21-0951 | NR      | - | - | - | ≤8  | 16  | >16 | >2    | ≤1 | ≤2 | >8 | >4 | 8   | >4 | 2   | 4  | 2  | >64 | >128 | >8 | >64 |
| 21-0989 | Class A | - | - | + | >32 | >16 | >16 | >2    | ≤1 | >8 | >8 | >4 | >32 | >4 | >16 | >8 | >8 | >64 | >128 | >8 | >64 |
| 21-0990 | CP      | - | + | - | >32 | >16 | >16 | >2    | ≤1 | >8 | >8 | >4 | >32 | >4 | >16 | >8 | >8 | >64 | >128 | >8 | 64  |
| 21-0991 | Class A | - | - | + | >32 | >16 | >16 | >2    | ≤1 | >8 | >8 | >4 | >32 | >4 | >16 | >8 | >8 | >64 | >128 | >8 | >64 |
| 21-0993 | Class B | + | - | - | >32 | >16 | >16 | >2    | 2  | >8 | >8 | >4 | >32 | >4 | 8   | >8 | >8 | ≤16 | >128 | >8 | 64  |
| 21-0994 | Class D | - | - | - | >32 | 8   | 8   | >2    | ≤1 | >8 | >8 | >4 | 16  | >4 | ≤1  | 4  | ≤1 | >64 | >128 | >8 | 8   |
| 21-0995 | Class B | + | - | - | >32 | >16 | >16 | >2    | ≤1 | >8 | >8 | >4 | >32 | >4 | 4   | >8 | >8 | 32  | >128 | >8 | 64  |
| 21-1037 | Class D | - | - | - | >32 | >16 | >16 | >2    | ≤1 | >8 | >8 | >4 | >32 | >4 | >16 | >8 | >8 | 32  | >128 | >8 | >64 |
| 21-1038 | Class B | + | - | - | >32 | >16 | >16 | >2    | ≤1 | >8 | >8 | >4 | >32 | >4 | 8   | >8 | >8 | ≤16 | >128 | >8 | 64  |
| 21-1041 | NR      | - | - | - | >32 | 16  | 2   | 0.25  | ≤1 | 4  | >8 | ≤1 | 8   | >4 | ≤1  | 2  | ≤1 | 64  | >128 | ≤2 | 8   |
| 21-1050 | CP      | - | - | + | >32 | >16 | >16 | >2    | ≤1 | >8 | >8 | >4 | >32 | >4 | >16 | >8 | >8 | >64 | >128 | >8 | >64 |
| 21-1055 | CP      | - | - | + | >32 | >16 | >16 | >2    | ≤1 | >8 | >8 | 2  | >16 | >4 | >16 | >8 | ≤1 | 64  | >128 | ≤2 | >64 |
| 21-1059 | CP      | + | - | + | >32 | >16 | >16 | >2    | ≤1 | 8  | >8 | >4 | >32 | >4 | 16  | >8 | >8 | ≤16 | >128 | >8 | 64  |
| 21-1060 | Class B | + | - | - | >32 | >16 | >16 | >2    | 2  | >8 | >8 | >4 | >32 | >4 | 8   | >8 | >8 | 32  | >128 | >8 | >64 |
| 21-1062 | CP      | - | - | + | >32 | >16 | >16 | >2    | ≤1 | >8 | >8 | >4 | >32 | >4 | >16 | >8 | >8 | >64 | >128 | >8 | >64 |
| 21-1067 | Class D | - | - | + | >32 | >16 | >16 | >2    | ≤1 | >8 | >8 | >4 | >32 | >4 | >16 | >8 | >8 | 32  | >128 | >8 | >64 |
| 21-1068 | Class D | - | - | + | >32 | >16 | >16 | >2    | ≤1 | >8 | 4  | >4 | 16  | >4 | >16 | >8 | >8 | 64  | >128 | >8 | >64 |
| 21-1077 | CP      | - | - | - | >32 | >16 | >16 | >2    | ≤1 | >8 | >8 | >4 | >32 | >4 | >16 | >8 | >8 | >64 | >128 | >8 | >64 |
| 21-1079 | Class B | + | - | - | >32 | >16 | >16 | >2    | ≤1 | >8 | >8 | >4 | >32 | >4 | 8   | >8 | >8 | 32  | >128 | >8 | 64  |
| 21-1081 | Class A | - | - | + | >32 | >16 | >16 | >2    | ≤1 | >8 | >8 | >4 | >32 | >4 | >16 | >8 | >8 | 32  | >128 | >8 | >64 |
| 21-1083 | Class D | - | - | - | >32 | >16 | >16 | >2    | ≤1 | >8 | >8 | >4 | >32 | >4 | >16 | >8 | >8 | 32  | >128 | >8 | >64 |
| 21-1087 | CP      | - | - | + | >32 | >16 | >16 | >2    | ≤1 | >8 | >8 | >4 | >32 | >4 | >16 | >8 | >8 | 32  | >128 | >8 | >64 |
| 21-1136 | Class D | - | - | - | >32 | >16 | >16 | >2    | ≤1 | >8 | >8 | >4 | >32 | >4 | >16 | >8 | >8 | 32  | >128 | >8 | >64 |
| 21-1134 | NR      | + | - | - | ≤8  | >16 | >16 | >2    | ≤1 | ≤2 | >8 | ≤1 | 16  | >4 | 2   | 4  | 2  | ≤16 | >128 | ≤2 | 64  |
| 21-1142 | CP      | - | - | + | >32 | >16 | >16 | >2    | >4 | >8 | >8 | >4 | >32 | >4 | >16 | >8 | >8 | >64 | >128 | >8 | >64 |
| 21-1160 | Class B | - | - | - | >32 | >16 | >16 | >2    | ≤1 | >8 | >8 | >4 | >32 | >4 | >16 | >8 | >8 | 32  | >128 | >8 | >64 |
| 21-674  | Class A | - | + | + | >32 | >16 | >16 | >2    | 4  | >8 | >8 | >4 | 32  | >4 | >16 | 8  | >8 | 64  | >128 | >8 | 32  |
| 22-1133 | Class A | - | - | + | >32 | >16 | >16 | >2    | ≤1 | >8 | >8 | >4 | >32 | >4 | >16 | >8 | >8 | 32  | >128 | >8 | >64 |
| 22-1134 | Class B | + | - | - | >32 | >16 | >16 | >2    | ≤1 | >8 | >8 | >4 | >32 | >4 | 8   | >8 | >8 | 32  | >128 | >8 | >64 |
| 22-1178 | Class B | - | - | - | ≤8  | 4   | 4   | 0.25  | ≤1 | ≤2 | >8 | ≤1 | 16  | >4 | 8   | 4  | ≤1 | 64  | >128 | ≤2 | 8   |
| 22-1182 | Class B | + | - | - | >32 | >16 | >16 | >2    | ≤1 | >8 | >8 | >4 | >32 | >4 | 2   | >8 | >8 | 32  | >128 | >8 | >64 |
| 22-1189 | Class A | - | - | + | >32 | >16 | >16 | >2    | ≤1 | >8 | >8 | >4 | >32 | >4 | >16 | >8 | >8 | 32  | >128 | >8 | >64 |
| 22-1202 | CP      | + | - | + | >32 | >16 | >16 | >2    | ≤1 | >8 | >8 | >4 | >32 | >4 | >16 | >8 | >8 | 64  | >128 | >8 | >64 |
| 22-1240 | Class B | - | - | - | ≤8  | 4   | 4   | 0.25  | ≤1 | ≤2 | >8 | ≤1 | 16  | >4 | 8   | 4  | ≤1 | 64  | >128 | ≤2 | 8   |
| 22-1250 | Class A | - | - | + | >32 | >16 | >16 | >2    | ≤1 | >8 | >8 | >4 | >32 | >4 | >16 | >8 | >8 | 32  | >128 | >8 | >64 |
| 22-1263 | CP      | - | + | - | >32 | >16 | >16 | >2    | ≤1 | >8 | >8 | >4 | >32 | >4 | >16 | >8 | >8 | 64  | >128 | >8 | 16  |
| 22-1284 | Class B | + | - | - | 32  | >16 | >16 | >2    | ≤1 | 4  | >8 | >4 | 16  | >4 | >16 | >8 | >8 | >64 | >128 | >8 | 64  |
| 22-1285 | Class D | - | - | - | >32 | >16 | >16 | >2    | ≤1 | >8 | >8 | >4 | >32 | >4 | >16 | >8 | >8 | >64 | >128 | >8 | >64 |
| 22-1287 | NR      | + | - | - | ≤8  | 8   | 16  | 1     | ≤1 | ≤2 | >8 | 4  | 16  | >4 | >16 | 8  | ≤1 | 64  | >128 | 4  | 16  |



|         |         |   |   |   |     |     |     |       |    |    |    |    |     |    |     |    |    |     |      |    |     |
|---------|---------|---|---|---|-----|-----|-----|-------|----|----|----|----|-----|----|-----|----|----|-----|------|----|-----|
| 22-1288 | NR      | - | - | - | 8   | 16  | 8   | 1     | ≤1 | 4  | 8  | 4  | 16  | >4 | >16 | 8  | 2  | >64 | >128 | 4  | 16  |
| 22-1384 | CP      | - | - | + | >32 | >16 | >16 | >2    | ≤1 | >8 | >8 | >4 | >32 | >4 | >16 | >8 | >8 | >64 | >128 | >8 | >64 |
| 22-1390 | CP      | - | + | - | >32 | >16 | >16 | >2    | ≤1 | >8 | >8 | >4 | >32 | >4 | >16 | >8 | >8 | >64 | >128 | >8 | 64  |
| 22-1395 | Class A | - | - | + | >32 | >16 | >16 | >2    | ≤1 | >8 | >8 | >4 | >32 | >4 | >16 | >8 | >8 | 32  | >128 | >8 | >64 |
| 22-1397 | CP      | - | + | + | >32 | >16 | >16 | >2    | ≤1 | >8 | >8 | >4 | >32 | >4 | >16 | >8 | >8 | >64 | >128 | >8 | 16  |
| 22-1416 | Class D | - | - | + | >32 | >16 | >16 | >2    | ≤1 | >8 | >8 | >4 | >32 | >4 | ≤1  | >8 | >8 | 32  | >128 | >8 | >64 |
| 22-1420 | Class A | - | - | + | >32 | >16 | >16 | >2    | ≤1 | >8 | >8 | >4 | >32 | >4 | >16 | >8 | >8 | 32  | >128 | >8 | >64 |
| 22-1428 | CP      | - | - | + | >32 | >16 | >16 | >2    | ≤1 | 8  | >8 | >4 | >32 | >4 | >16 | >8 | >8 | >64 | >128 | >8 | >64 |
| 22-1432 | NR      | - | - | + | 8   | 8   | 4   | 1     | ≤1 | 4  | >8 | 4  | 16  | >4 | 16  | 4  | ≤1 | 64  | >128 | ≤2 | 16  |
| 22-1442 | Class D | + | - | - | ≤8  | 2   | 4   | 1     | 2  | >8 | >8 | 2  | >32 | 2  | 4   | 2  | ≤1 | 32  | >128 | ≤2 | ≤4  |
| 22-1452 | Class B | + | - | - | >32 | >16 | >16 | >2    | ≤1 | >8 | >8 | >4 | >32 | >4 | 8   | >8 | >8 | 64  | >128 | >8 | 64  |
| 22-1487 | Class B | + | - | - | 32  | >16 | >16 | >2    | ≤1 | 4  | >8 | >4 | >32 | >4 | >16 | >8 | >8 | ≤16 | >128 | >8 | 64  |
| 22-1491 | NR      | - | - | - | >32 | >16 | >16 | >2    | ≤1 | >8 | >8 | >4 | 16  | >4 | ≤1  | 8  | >8 | 32  | >128 | >8 | 64  |
| 22-1516 | Class A | - | - | + | >32 | 4   | 8   | 0.5   | ≤1 | 4  | >8 | ≤1 | >32 | >4 | ≤1  | 4  | 8  | ≤16 | >128 | ≤2 | 32  |
| 22-1519 | CP      | - | + | - | >32 | >16 | >16 | >2    | ≤1 | >8 | >8 | >4 | >32 | >4 | 16  | >8 | >8 | >64 | >128 | >8 | 32  |
| 22-1551 | Class D | - | - | - | 16  | 4   | 8   | ≤0.12 | ≤1 | 8  | >8 | ≤1 | 16  | >4 | 8   | 4  | ≤1 | 64  | >128 | ≤2 | 8   |
| 22-1553 | NR      | - | - | - | 32  | 4   | 8   | ≤0.12 | ≤1 | 4  | >8 | ≤1 | 16  | >4 | 8   | 4  | ≤1 | 64  | >128 | ≤2 | 8   |
| 22-1555 | Class D | - | - | - | >32 | >16 | >16 | >2    | ≤1 | >8 | >8 | >4 | 16  | >4 | 16  | 8  | >8 | 32  | >128 | >8 | 64  |
| 22-1558 | Class A | - | - | + | >32 | >16 | >16 | >2    | ≤1 | >8 | >8 | >4 | 16  | >4 | 16  | 8  | >8 | 32  | >128 | >8 | 64  |
| 22-1573 | Class B | + | - | - | >32 | >16 | >16 | >2    | ≤1 | >8 | >8 | >4 | >32 | >4 | 8   | >8 | >8 | 32  | >128 | >8 | 64  |
| 22-1574 | Class D | - | - | - | 32  | 4   | 4   | ≤0.12 | ≤1 | 4  | >8 | ≤1 | 16  | >4 | 8   | 2  | ≤1 | 64  | >128 | ≤2 | 8   |
| 22-1579 | Class D | - | - | - | 32  | 4   | 4   | ≤0.12 | ≤1 | 8  | >8 | ≤1 | 16  | >4 | 8   | 2  | ≤1 | 64  | >128 | ≤2 | 8   |
| 22-1580 | Class D | - | - | - | 32  | 4   | 4   | ≤0.12 | ≤1 | 8  | >8 | ≤1 | 16  | >4 | 8   | 2  | ≤1 | 32  | >128 | ≤2 | 8   |
| 22-1590 | Class D | - | - | - | 16  | 4   | 4   | ≤0.12 | ≤1 | 8  | >8 | ≤1 | 16  | >4 | 8   | 2  | ≤1 | 64  | >128 | ≤2 | 8   |
| 22-1593 | NR      | - | - | - | 32  | 4   | 4   | ≤0.12 | ≤1 | 8  | >8 | ≤1 | 16  | >4 | 8   | 4  | ≤1 | 64  | >128 | ≤2 | 8   |
| 22-1597 | Class A | - | - | - | ≤8  | 16  | 16  | 1     | ≤1 | ≤2 | >8 | 4  | 32  | >4 | >16 | 8  | ≤1 | >64 | >128 | 4  | 32  |
| 22-1599 | Class D | - | - | - | 16  | 4   | 8   | ≤0.12 | ≤1 | 4  | >8 | ≤1 | 16  | >4 | 8   | 2  | ≤1 | 32  | >128 | ≤2 | 8   |
| 22-1601 | NR      | - | - | - | 32  | 4   | 4   | ≤0.12 | ≤1 | 8  | >8 | ≤1 | 16  | >4 | 8   | 2  | ≤1 | 64  | >128 | ≤2 | 8   |
| 22-1609 | Class D | - | - | - | 32  | 4   | 4   | ≤0.12 | ≤1 | 4  | >8 | ≤1 | 16  | >4 | 8   | 2  | ≤1 | 64  | >128 | ≤2 | 8   |
| 22-1614 | Class B | + | - | - | >32 | >16 | >16 | >2    | ≤1 | >8 | >8 | >4 | >32 | >4 | 8   | >8 | >8 | 32  | >128 | >8 | 64  |
| 22-1618 | NR      | - | - | - | 32  | 4   | 8   | ≤0.12 | ≤1 | 4  | >8 | ≤1 | 16  | >4 | 8   | 2  | ≤1 | 32  | >128 | ≤2 | 8   |
| 22-1667 | Class D | - | - | - | >32 | 4   | 16  | 0.25  | ≤1 | 8  | >8 | ≤1 | >32 | >4 | 8   | 4  | 8  | ≤16 | >128 | ≤2 | 32  |
| 22-1669 | NR      | - | - | - | 32  | 4   | 4   | >2    | ≤1 | 4  | >8 | >4 | >32 | >4 | >16 | 2  | >8 | >64 | >128 | >8 | 8   |
| 22-1672 | NR      | - | - | - | ≤8  | 4   | 4   | 0.25  | ≤1 | ≤2 | >8 | ≤1 | 4   | >4 | 8   | 2  | ≤1 | ≤16 | >128 | ≤2 | 8   |
| 22-1673 | NR      | - | - | + | 16  | 4   | 4   | >2    | ≤1 | 4  | >8 | ≤1 | 32  | >4 | 8   | 4  | ≤1 | 64  | >128 | ≤2 | 8   |
| 22-1675 | NR      | - | - | - | ≤8  | 4   | 4   | 0.25  | ≤1 | ≤2 | >8 | ≤1 | 8   | >4 | 8   | 4  | ≤1 | 64  | >128 | ≤2 | 8   |
| 22-1676 | Class B | - | - | - | ≤8  | 4   | 8   | ≤0.12 | ≤1 | ≤2 | >8 | ≤1 | 8   | >4 | 8   | 2  | ≤1 | 64  | >128 | ≤2 | 32  |
| 22-1677 | Class D | - | - | - | 16  | 4   | 4   | ≤0.12 | ≤1 | >8 | >8 | ≤1 | 16  | >4 | 8   | 2  | ≤1 | 64  | >128 | ≤2 | 8   |
| 22-1678 | NR      | - | - | - | 8   | >16 | >16 | >2    | ≤1 | 4  | 8  | >4 | 4   | 4  | >16 | >8 | >8 | >64 | >128 | >8 | >64 |
| 22-1679 | Class D | - | - | - | 32  | >16 | >16 | 1     | ≤1 | 4  | >8 | 2  | >32 | >4 | 16  | 2  | ≤1 | 32  | >128 | ≤2 | 64  |
| 22-1680 | Class B | - | + | - | >32 | >16 | >16 | >2    | ≤1 | >8 | >8 | >4 | >32 | >4 | 8   | >8 | >8 | 64  | >128 | >8 | 64  |
| 22-1681 | Class B | + | - | - | >32 | >16 | >16 | >2    | ≤1 | >8 | >8 | >4 | >32 | >4 | 8   | >8 | >8 | 64  | >128 | >8 | 64  |
| 22-1682 | Class B | + | - | - | 16  | >16 | >16 | 0.25  | ≤1 | 4  | >8 | ≤1 | >32 | >4 | 8   | >8 | >8 | 64  | >128 | ≤2 | >64 |
| 22-1683 | CP      | - | + | - | >32 | >16 | >16 | >2    | ≤1 | >8 | >8 | >4 | >32 | >4 | >16 | >8 | >8 | >64 | >128 | >8 | 32  |
| 22-1684 | Class B | + | - | - | >32 | >16 | >16 | >2    | ≤1 | >8 | >8 | >4 | >32 | >4 | 8   | >8 | >8 | 64  | >128 | >8 | 64  |
| 22-1686 | NR      | - | - | + | >32 | 8   | 4   | >2    | ≤1 | 4  | >8 | >4 | >16 | >4 | 16  | 4  | ≤1 | >64 | >128 | >8 | 16  |
| 22-1687 | NR      | - | - | - | >32 | >16 | 4   | >2    | ≤1 | 4  | >8 | >4 | >32 | >4 | >16 | 4  | >8 | >64 | >128 | >8 | 16  |
| 22-1689 | NR      | - | - | - | ≤8  | 2   | 2   | 0.25  | ≤1 | ≤2 | >8 | ≤1 | 8   | >4 | 4   | 2  | ≤1 | 64  | >128 | ≤2 | ≤4  |
| 22-1690 | NR      | - | - | - | ≤8  | 2   | 2   | 0.25  | ≤1 | ≤2 | >8 | ≤1 | 8   | >4 | 8   | 2  | ≤1 | >64 | >128 | ≤2 | ≤4  |
| 22-1725 | CP      | - | + | - | >32 | >16 | >16 | >2    | ≤1 | >8 | >8 | >4 | >32 | >4 | >16 | >8 | >8 | >64 | >128 | >8 | 32  |
| 22-1756 | CP      | - | - | + | >32 | >16 | >16 | >2    | ≤1 | >8 | >8 | >4 | >32 | >4 | >16 | >8 | >8 | >64 | >128 | >8 | >64 |
| 22-1758 | NR      | - | - | + | >32 | >16 | >16 | >2    | ≤1 | >8 | >8 | >4 | >32 | >4 | >16 | >8 | >8 | 64  | >128 | >8 | 16  |
| 22-1759 | NR      | - | + | - | 32  | >16 | >16 | >2    | ≤1 | >8 | >8 | >4 | >32 | >4 | >16 | >8 | >8 | 64  | >128 | >8 | 32  |
| 22-1760 | CP      | - | - | + | ≤8  | >16 | >16 | >2    | ≤1 | ≤2 | >8 | >4 | >32 | >4 | 8   | 8  | >8 | 64  | >128 | >8 | 64  |
| 22-1761 | CP      | - | + | - | 16  | >16 | >16 | >2    | ≤1 | 8  | >8 | >4 | >32 | >4 | >16 | >8 | >8 | >64 | >128 | >8 | 32  |
| 22-1762 | NR      | - | + | - | >32 | >16 | >16 | >2    | ≤1 | >8 | >8 | >4 | >32 | >4 | >16 | >8 | >8 | >64 | >128 | >8 | 16  |
| 22-1765 | CP      | - | - | + | >32 | >16 | >16 | >2    | ≤1 | >8 | >8 | >4 | >32 | >4 | >16 | >8 | >8 | >64 | >128 | >8 | >64 |
| 22-1770 | NR      | + | - | - | 32  | 16  | >16 | >2    | ≤1 | 4  | >8 | >4 | 32  | >4 | >16 | >8 | >8 | ≤16 | >128 | >8 | 64  |
| 22-1771 | NR      | - | - | - | ≤8  | 2   | >16 | ≤0.12 | ≤1 | ≤2 | >8 | ≤1 | >32 | >4 | 8   | 2  | ≤1 | >64 | >128 | ≤2 | ≤4  |

AMK: amikacin, FEP: cefepime, CAZ: ceftazidime, CIP: ciprofloxacin, COL: colistin, GEN: gentamicin, IPM: imipenem, LVX: levofloxacin, MEM: meropenem, SXT: trimethoprim/sulfamethoxazole, ATM: aztreonam, CZA: ceftazidime-avibactam, CZT: ceftolozane/tazobactam, FOS: fosfomycin, NIT: nitrofurantoin, NOR: norfloxacin, TZP: piperacillin/tazobactam. NR: no recommendation, CP: carbapenemase producer. – negative, + positive
